# Supplementary material for: Pathways connecting socioeconomic variables, substance abuse and gambling behaviour: a cross-sectional study on a sample of Italian high-school students
Source: PubMed Central journal article supplement — BMJ Open. 2019 Nov 11;9(11):e031737. doi: 10.1136/bmjopen-2019-031737 (PMC6858210; doi:10.1136/bmjopen-2019-031737), 2019-11-11
Supplement: bmjopen-2019-031737.draft_revisions.pdf [file bmjopen-2019-031737.draft_revisions.pdf]

# BMJ Open

BMJ Open is committed to open peer review. As part of this commitment we make the peer review history of every article we publish publicly available.

When an article is published we post the peer reviewers' comments and the authors' responses online. We also post the versions of the paper that were used during peer review. These are the versions that the peer review comments apply to.

The versions of the paper that follow are the versions that were submitted during the peer review process. They are not the versions of record or the final published versions. They should not be cited or distributed as the published version of this manuscript.

BMJ Open is an open access journal and the full, final, typeset and author-corrected version of record of the manuscript is available on our site with no access controls, subscription charges or pay-per-view fees (<http://bmjopen.bmj.com>).

If you have any questions on BMJ Open's open peer review process please email [info.bmjopen@bmj.com](mailto:info.bmjopen@bmj.com)

# BMJ Open

## Pathways connecting socio-economic status and health-risk behaviors

|                               |                                                                                                                                                                                                                                                                                                                                                                                                                                                                                                                                                                                                                                                                                                                                                                                                                                                                                                                                                                                                                                                                             |
|-------------------------------|-----------------------------------------------------------------------------------------------------------------------------------------------------------------------------------------------------------------------------------------------------------------------------------------------------------------------------------------------------------------------------------------------------------------------------------------------------------------------------------------------------------------------------------------------------------------------------------------------------------------------------------------------------------------------------------------------------------------------------------------------------------------------------------------------------------------------------------------------------------------------------------------------------------------------------------------------------------------------------------------------------------------------------------------------------------------------------|
| Journal:                      | <i>BMJ Open</i>                                                                                                                                                                                                                                                                                                                                                                                                                                                                                                                                                                                                                                                                                                                                                                                                                                                                                                                                                                                                                                                             |
| Manuscript ID                 | bmjopen-2019-031737                                                                                                                                                                                                                                                                                                                                                                                                                                                                                                                                                                                                                                                                                                                                                                                                                                                                                                                                                                                                                                                         |
| Article Type:                 | Research                                                                                                                                                                                                                                                                                                                                                                                                                                                                                                                                                                                                                                                                                                                                                                                                                                                                                                                                                                                                                                                                    |
| Date Submitted by the Author: | 16-May-2019                                                                                                                                                                                                                                                                                                                                                                                                                                                                                                                                                                                                                                                                                                                                                                                                                                                                                                                                                                                                                                                                 |
| Complete List of Authors:     | <p>Buja, Alessandra; University of Padua, Department of Cardiological, Thoracic, Vascular Sciences and Public Health<br/> Mortali, Claudia; Istituto Superiore di Sanità, Centro Nazionale Dipendenze e Doping<br/> Mastrobattista, Luisa; Istituto Superiore di Sanità, Centro Nazionale Dipendenze e Doping<br/> Minutillo, Adele; Istituto Superiore di Sanità, Centro Nazionale Dipendenze e Doping<br/> Pichini, Simona; Istituto Superiore di Sanità, Centro Nazionale Dipendenze e Doping<br/> Genetti, Bruno; Explora Center for Research and Statistical Analysis<br/> Vian, Paolo; Explora Center for Research and Statistical Analysis<br/> Andreotti, Alessandra; Explora Center for Research and Statistical Analysis<br/> Grotto, Giulia; University of Padua, Department of Cardiological, Thoracic, Vascular Sciences and Public Health<br/> Baldo, Vincenzo; University of Padua, Department of Cardiological, Thoracic, Vascular Sciences and Public Health<br/> Pacifci, Roberta; Istituto Superiore di Sanità, Centro Nazionale Dipendenze e Doping</p> |
| Keywords:                     | PUBLIC HEALTH, adolescents, health-risk behaviors, substance, gambling                                                                                                                                                                                                                                                                                                                                                                                                                                                                                                                                                                                                                                                                                                                                                                                                                                                                                                                                                                                                      |
|                               |                                                                                                                                                                                                                                                                                                                                                                                                                                                                                                                                                                                                                                                                                                                                                                                                                                                                                                                                                                                                                                                                             |

SCHOLARONE™  
Manuscripts

# Pathways connecting socio-economic status and health-risk behaviors

Alessandra Buja, Claudia Mortali, Luisa Mastrobattista, Adele Minutillo, Simona Pichini, Bruno Genetti, Paolo Vian, Alessandra Andreotti, Giulia Grotto, Vincenzo Baldo, Roberta Pacifici

*Alessandra Buja*, Department of Cardiological, Thoracic, Vascular Sciences and Public Health, University of Padua, Via Loredan 18, 35128 Padova (Italy). E-mail: [alessandra.buja@unipd.it](mailto:alessandra.buja@unipd.it)

*Claudia Mortali*, Centro Nazionale Dipendenze e Doping, Istituto Superiore di Sanità, Viale Regina Elena 299, 00161 Roma, Italy. E-mail: [claudia.mortali@iss.it](mailto:claudia.mortali@iss.it)

*Luisa Mastrobattista*, Centro Nazionale Dipendenze e Doping, Istituto Superiore di Sanità, Viale Regina Elena 299, 00161 Roma, Italy. E-mail: [luisa.mastrobattista@iss.it](mailto:luisa.mastrobattista@iss.it)

*Adele Minutillo*, Centro Nazionale Dipendenze e Doping, Istituto Superiore di Sanità, Viale Regina Elena 299, 00161 Roma, Italy. E-mail: [adele.minutillo@iss.it](mailto:adele.minutillo@iss.it)

*Simona Pichini*, Centro Nazionale Dipendenze e Doping, Istituto Superiore di Sanità, Viale Regina Elena 299, 00161 Roma, Italy. E-mail: [simona.pichini@iss.it](mailto:simona.pichini@iss.it)

*Bruno Genetti*, Explora Center for Research and Statistical Analysis, Vigodarzere (PD), Italy. E-mail: [bruno.genetti@centroexplora.it](mailto:bruno.genetti@centroexplora.it)

*Paolo Vian*, Explora Center for Research and Statistical Analysis, Vigodarzere (PD), Italy. E-mail: [paolo.vian@centroexplora.it](mailto:paolo.vian@centroexplora.it)

*Alessandra Andreotti*, Explora Center for Research and Statistical Analysis, Vigodarzere (PD), Italy. E-mail: [alessandra.andreotti@centroexplora.it](mailto:alessandra.andreotti@centroexplora.it)

*Giulia Grotto*, Department of Cardiological, Thoracic, Vascular Sciences and Public Health, University of Padua, Via Loredan 18, 35128 Padova (Italy). E-mail: [giulia.grotto.1@studenti.unipd.it](mailto:giulia.grotto.1@studenti.unipd.it)

1  
2  
3 *Vincenzo Baldo*, Department of Cardiological, Thoracic, Vascular Sciences and Public Health,  
4 University of Padua, Via Loredan 18, 35128 Padova (Italy). E-mail: [vincenzo.baldo@unipd.it](mailto:vincenzo.baldo@unipd.it)  
5

6  
7 *Roberta Pacifici*, Centro Nazionale Dipendenze e Doping, Istituto Superiore di Sanità, Viale Regina  
8 Elena 299, 00161 Roma, Italy. E-mail: [roberta.pacifici@iss.it](mailto:roberta.pacifici@iss.it)  
9

10  
11  
12  
13  
14 **Address correspondence to:**

15  
16 *Alessandra Buja*,

17  
18 *Department of Cardiological, Thoracic, Vascular Sciences and Public Health, University of Padova,*  
19  
20 *Via Loredan 18, 35128 Padova (ITALY).*  
21

22  
23  
24 *E-mail: [alessandra.buja@unipd.it](mailto:alessandra.buja@unipd.it); tel 049/8275387; fax 049/8275392*  
25

26  
27  
28 **Word count:** 3,059.  
29  
30  
31  
32  
33  
34  
35  
36  
37  
38  
39  
40  
41  
42  
43  
44  
45  
46  
47  
48  
49  
50  
51  
52  
53  
54  
55  
56  
57  
58  
59  
60

## DECLARATIONS

### Competing interests

The authors have no competing interests to disclose.

### Ethical approval and consent to participation

The study complied with the Declaration of Helsinki and with Italian Law n. 196/2003 on the protection of personal data. The questionnaires were anonymous, with no chance of individuals being identifiable. Consent to the students' participation was required first from the school director, then all parents signed to their consent to the minors' participation in the survey.

### Funding

The study was sponsored and financed by the *Agenzia delle Dogane e dei Monopoli dello Stato*. The agency had no role in the design of the study, the collection, analysis, and interpretation of the data, the writing of the manuscript, or the decision to submit the paper for publication.

### Data sharing

No additional data available.

### Authors' contributions

Alessandra Buja conceptualized the study, interpreted the data, and drafted the manuscript.

Claudia Mortali obtained funding, coordinated all study phases, and approved the final manuscript as submitted.

1  
2  
3 Luisa Mastrobattista was involved in planning and supervising the work, and approved the final  
4 manuscript as submitted.  
5  
6

7 Adele Minutillo was involved in planning and supervising the work, and approved the final manuscript  
8 as submitted.  
9  
10

11 Simona Pichini conceived, designed and directed the project.  
12  
13

14 Bruno Genetti designed the data collection tools, and coordinated and supervised data collection.  
15  
16

17 Paolo Vian carried out the statistical analyses, and approved the final manuscript as submitted.  
18

19 Alessandra Andreotti carried out the statistical analyses, and approved the final manuscript as submitted.  
20

21 Giulia Grotto drafted the manuscript and approved the final manuscript as submitted.  
22

23 Vincenzo Baldo critically reviewed and revised the manuscript.  
24

25 Roberta Pacifici supervised the study, obtained funding, and approved the final manuscript as submitted.  
26  
27  
28  
29

### 30 **Acknowledgements** 31

32 Not applicable.  
33  
34  
35  
36  
37  
38  
39  
40  
41  
42  
43  
44  
45  
46  
47  
48  
49  
50  
51  
52  
53  
54  
55  
56  
57  
58  
59  
60

## ABSTRACT

### Background:

Pathological gambling is often associated with high comorbidity rates for alcohol-related disorders, nicotine and other substance dependence, suggesting that each of these types of behavior may serve as a primer for the others. Previous studies focused on identifying the major risk factors underlying substance use and gambling among the young, such as demographic characteristics and socio-economic status, but there is no an overall picture of their association with different health-risk behaviors. The aim of this study was to elucidate the pathway of associations linking gambling, alcohol intake, smoking habit, cannabis consumption between each other and with demographic and socio-economic variables.

### Methods:

A survey was conducted in 2017 on a representative sample of 15,602 Italian 14- to 17-year-olds attending 201 secondary schools. Structural Equation Models analysis was used to assess the pathway between gambling, alcohol intake, smoking, cannabis consumption, demographics and socio-economic factors.

### Results:

Irrespective of socio-economic or demographic variables, gambling is positively associated with alcohol and cannabis consumption, while cannabis consumption is predicted by smoking and by alcohol intake, smoking is predicted by alcohol intake. Adolescents with a higher weekly income are more at risk of gambling, drinking alcohol and smoking, while the degree of economic dissatisfaction was positively associated with alcohol intake, cannabis consumption and smoking. Maternal employment appeared to be positively associated with adolescents' smoking, alcohol intake and cannabis consumption.

## Conclusions:

This is one of the first studies to shed light on the pathways of associations connecting various health-risk behaviors among adolescents with demographic and socioeconomic factors.

## ARTICLE SUMMARY

### Strengths and limitations of this study

- The study involved a representative sample of Italian school students.
- Self-reports data were collected which could be biased by under-reporting of respondents about their risk-taking behavior; to mitigate this potential bias, we guaranteed respondents' anonymity and confidentiality.
- Path analysis enables the simultaneous estimation of several associated regression showing interrelation through which independent variables produce both direct and indirect effects on more than one dependent variable; both the magnitude and the significance of associations between variables were estimated.



## INTRODUCTION

In the last decade, problem gambling, alcohol consumption and substance abuse among adolescents has emerged as a growing public health issue[1,2]. Further, gambling disorder has been reclassified as an addiction and related disorder alongside alcohol and other substance use disorders[3].

Adolescence is a developmental stage in which addictions can develop when the experimental use of alcohol, tobacco and drug turns into patterns of regular substance use[4,5]. Previous studies found that pathological gambling was often associated with high comorbidity rates for alcohol-related disorders, and nicotine and substance dependence, suggesting that each of these types of behavior may serve as a primer for the others[6-9]. Other investigations suggested that acute alcohol ingestion may increase the propensity to gamble soon afterwards[10].

Just as various types of substance abuse act as a gateway to others, the literature has demonstrated that different substance abuse risk factors seem to overlap in their association with adolescents' health-risk behaviors. Specific to adolescent development, for example, is the correlation between parents' low socio-economic status (SES) and the risk of problem behavior in their adolescent offspring[11], whereas higher household incomes seem to be protective, possibly due to their linkage with positive parenting styles and advantaged life circumstances[12]. Problem gambling also seems to be more common in the low SES population[13].

Several studies have investigated the association between substance abuse or gambling risk factors - including socio-economic characteristics such as male gender, young age, neighborhood disadvantage, and low SES[14-16] - and specific types of health-risk behavior, such as alcohol drinking, cigarette smoking, and illicit substance use[15,17,18]. To our knowledge, however, no prior research has sought at the same time to examine the potential explanatory pathway between the former major risk factors and

1  
2  
3 the latter health-risk behaviors. Hence, our interest in investigating how the relationships between SES  
4  
5 and health-risk behaviors drive towards the development of gambling behavior in adolescence.  
6

7  
8 In an attempt to shed light on these associations between SES, substance abuse and gambling behavior,  
9  
10 we simultaneously considered the multiple potential pathways between gambling, alcohol intake,  
11  
12 smoking habit, cannabis consumption, and socio-economic variables, drawing on data from a large  
13  
14 representative population of Italian high-school students.  
15  
16  
17  
18  
19  
20  
21  
22  
23  
24  
25  
26  
27  
28  
29  
30  
31  
32  
33  
34  
35  
36  
37  
38  
39  
40  
41  
42  
43  
44  
45  
46  
47  
48  
49  
50  
51  
52  
53  
54  
55  
56  
57  
58  
59  
60

## METHODS

The sample population was drawn from the "Gambling in Italy" project, a student population survey conducted in 2017 by the *Istituto Superiore di Sanità*. For the purposes of the present study, the survey is briefly described below.

### Study sample

The sample refers to the Italian student population between 14 and 17 years of age, taking into account the population's geographical distribution nationwide in order to intercept metropolitan, urban and suburban areas. The sampling method followed a three-stage PPS (Probability Proportional to Size) model, where the first-stage units were represented by the cities, the second-stage units by the schools, and the third-stage units by the classes. The sampling design involved stratifying the first-, second- and third-stage units as follows. In each stratum: the first-stage units (cities) were selected with probabilities proportional to the number of upper secondary school classes within the territory of the cities; the second-stage units (schools) were selected with probabilities proportional to the number of classes in the sample schools; and the third-stage units (classes) were selected in the same numbers for each school in the stratum to which they belonged. All students attending the sample classes were included in the sample. Using this sampling method meant that the probability of each class and each student in the target population being selected remained constant.

The survey was conducted using a Computer-Assisted Self Interview (CASI) method that enabled the questionnaire to be completed by students online using a non-replicable, unique, and anonymous access ID. Students accessed the questionnaire using a link provided by the technicians in the schools' computer rooms.

A total of 201 schools (187 public, 14 private) took part in the survey, and 859 classes were sampled, accounting for a student population of 18,042. A total of 17,610 online questionnaires were completed

1  
2  
3 at school by the students who agreed to participate in the survey. Six questionnaires were rejected because  
4 they were answered by students not resident in Italy (step 1); 267 were rejected because they were  
5 incomplete (step 2); another 1,504 were rejected because they were answered by students outside the age  
6 group considered in the survey (i.e. under 14 or over 17 years old) (step 3); and 231 were rejected because  
7 they contained answers judged scarcely plausible (unreliable or irrelevant responses were identified by  
8 means of a Rasch analysis; step 4). Thus, a final number of 15,602 questionnaires (88.6% of the total)  
9 were considered eligible for this study.  
10  
11  
12  
13  
14  
15  
16  
17  
18  
19  
20

### 21 **Patient and public involvement, ethical approval and consent to participation**

22 The study complied with the Declaration of Helsinki and with Italian Law n. 196/2003 on the protection  
23 of personal data. The questionnaires were anonymous, with no chance of individuals being identifiable.  
24 Consent to the students' participation was required first from the school director, then all parents signed  
25 to their consent to the minors' participation in the survey.  
26  
27  
28  
29  
30  
31

32 No patients were involved in this study.  
33  
34  
35  
36  
37

### 38 **Variables**

39 The demographic variables considered were age bracket (14-15y, 16-17y), and sex.  
40

41 The questionnaire examined respondents' SES and social environment by means of questions on: highest  
42 education level attained by parents (both with a university degree, one with a university degree, at least  
43 one with a high school diploma, both with an elementary or middle-school diploma); maternal  
44 employment (not working, working); paternal employment (not working, working); level of economic  
45 dissatisfaction (very satisfied/satisfied, neither satisfied nor dissatisfied, dissatisfied/very dissatisfied);  
46 amount of weekly pocket money (€0, €1-30, €31-100, €100 or more); parental death (both parents alive,  
47 at least one parent deceased).  
48  
49  
50  
51  
52  
53  
54  
55  
56  
57  
58  
59  
60

1  
2  
3 We also categorized the geographical area (Central-Northern Italy / Southern Italy and Islands) and  
4 considered the type of high school attended (vocational technical/professional schools/ scientific/artistic  
5 grammar schools).  
6  
7  
8

9  
10 The SOGS-RA scale[19,20] was used to examine respondents' gambling behavior. This validated tool  
11 contains 12 items and generates scores that range from 0 to 12. It measures several aspects, such as loss  
12 of control over the game, action taken to recover monetary losses, interference with family, school, and  
13 relational life, guilt feelings about money spent, and consequences of gambling. To be defined as  
14 "gamblers", respondents only had to report having been involved in a gambling activity at least once in  
15 the previous year. Then the SOGS-RA scale identifies three types of "gambler": non-problem (SOGS-  
16 RA score = 0–1); at risk (SOGS-RA = 2–3); and problem (SOGS-RA score higher than 4). Students who  
17 reported having no experience of gambling in the previous year were defined as "non-gamblers". For the  
18 purpose of this study, the variable assessing gambling behavior was divided into two categories: non-  
19 gamblers and non-problem gamblers vs at risk and problem gamblers.  
20  
21  
22  
23  
24  
25  
26  
27  
28  
29  
30  
31  
32

33 Respondents were also questioned about their risk-related substance use: smoking (never in the previous  
34 year / at least once in the previous year), cannabis consumption (never in the previous year / at least once  
35 in the previous year) and intake of alcoholic drinks, i.e. beer, wine, cocktails, spirits (never in the previous  
36 month / at least once in the previous month).  
37  
38  
39  
40  
41  
42  
43

#### 44 **Statistical analysis**

45  
46 The analysis did not use a complex survey approach. Given the large sample size, Bernoulli's simple  
47 random sampling method was adopted. A bivariate analysis was run on each of the above-described  
48 variables and gambling status. A set of Pearson's chi-squared tests was used to highlight any associations  
49 between gambling and the other variables.  
50  
51  
52  
53  
54  
55  
56  
57  
58  
59  
60

1  
2  
3 Path analysis via multiple regression was used to test causal models by examining the relationships  
4 between a dependent variable and independent variables. This enabled the simultaneous estimation of  
5 several associated regression relationships. In this analysis, a variable could be a dependent variable in  
6 one relationship and an independent variable in another. This method enables both the magnitude and  
7 the significance of causal connections between variables to be estimated[21], showing causal  
8 mechanisms through which independent variables produce both direct and indirect effects on a dependent  
9 variable.  
10  
11  
12  
13  
14  
15  
16  
17  
18

19 The path analysis model was estimated using Mplus® software, release 5.21[21]. To estimate the path  
20 coefficients, Mplus used OLS and maximum likelihood methods. The statistics used to test the  
21 significance and goodness of fit of the model were: the Root Mean Square Error of Approximation -  
22 RMSEA (lower than 0.08 for a goodness of fit model), the Comparative Fit Index - CFI (higher than 0.90  
23 for a goodness of fit model) and the Tucker Lewis index - TLI (higher than 0.90 for a goodness of fit  
24 model)[22].  
25  
26  
27  
28  
29  
30  
31  
32  
33  
34  
35  
36  
37  
38  
39  
40  
41  
42  
43  
44  
45  
46  
47  
48  
49  
50  
51  
52  
53  
54  
55  
56  
57  
58  
59  
60

## RESULTS

Of the 15,602 questionnaires analyzed, 50.9% were answered by females, and the mean age of respondents was 15.53 years ( $\pm 1.11$  SD). The prevalence of at-risk/problem gamblers was 6.5% (CI 6.1-6.9). As for the other behaviors considered, 45.4% (CI 44.6-46.2) of the students had had at least one alcoholic drink in the previous month, 25.6% (CI 24.9-26.3) had smoked at least once in the previous year, and 18.1% (CI 17.5-18.7) had consumed cannabis at least once in the previous year.

Table 1 shows the bivariate associations between the socio-demographic characteristics and the health-risk behaviors. Table 2 shows the bivariate associations between different health-risk behaviors. Figure 1 shows the pathway analysis.

Irrespective of the socio-economic and demographic variables, gambling was positively associated with alcohol and cannabis consumption, while cannabis consumption was predicted by smoking and alcohol intake, and smoking was predicted by alcohol intake. As regards the demographic factors, the pathway identified shows that males were more at risk of being involved in all the health-risk behaviors considered in this study except for smoking, while females seemed more likely to smoke. As for the socio-economic factors, adolescents with a higher weekly income were at greater risk of gambling, drinking alcohol and smoking, while the degree of economic dissatisfaction was positively associated with alcohol intake, cannabis consumption and smoking. Maternal employment seemed to be positively associated with adolescents' smoking, alcohol intake and cannabis consumption. Adolescents with better-educated parents were also at higher risk of drinking alcohol and consuming cannabis. Analyzing the geographical distribution of the different health-risk behaviors, it emerged that gambling was more common in Southern than in Central and Northern Italy, whereas cannabis consumption was more common among adolescents in the center and north of the country. When the prevalence of health-risk behavior was examined by type of school, it emerged that the vocational technical/professional school students were

1  
2  
3 more at risk of gambling, smoking and consuming alcohol, whereas cannabis consumption was higher at  
4  
5 scientific/artistic grammar schools. Lastly, respondents who reported having a deceased parent were  
6  
7 more likely to be smokers.  
8  
9  
10  
11  
12  
13  
14  
15  
16  
17  
18  
19  
20  
21  
22  
23  
24  
25  
26  
27  
28  
29  
30  
31  
32  
33  
34  
35  
36  
37  
38  
39  
40  
41  
42  
43  
44  
45  
46  
47  
48  
49  
50  
51  
52  
53  
54  
55  
56  
57  
58  
59  
60



**Table 1:** Bivariate association between socio-economic and demographic characteristics and health-risk behaviors.

|                                   |                                               | GAMBLING                            |                            |          | ALCOHOL INTAKE          |                                 |          | SMOKING                |                                |          | CANNABIS CONSUMPTION   |                                |          |
|-----------------------------------|-----------------------------------------------|-------------------------------------|----------------------------|----------|-------------------------|---------------------------------|----------|------------------------|--------------------------------|----------|------------------------|--------------------------------|----------|
|                                   |                                               | Non-gamblers + non-problem gamblers | At risk + problem gamblers | <i>p</i> | Never in previous month | At least once in previous month | <i>p</i> | Never in previous year | At least once in previous year | <i>p</i> | Never in previous year | At least once in previous year | <i>p</i> |
|                                   |                                               | % (n)                               | % (n)                      |          | % (n)                   | % (n)                           |          | % (n)                  | % (n)                          |          | % (n)                  | % (n)                          |          |
| Sex                               | Females                                       | 98.3 (7807)                         | 1.7 (133)                  | <0.001   | 60.2 (4777)             | 39.8 (3163)                     | <0.001   | 72.0 (5713)            | 28.0 (2227)                    | <0.001   | 85.0 (6752)            | 15.0 (1188)                    | <0.001   |
|                                   | Males                                         | 88.5 (6783)                         | 11.5 (879)                 |          | 48.9 (3745)             | 51.1 (3917)                     |          | 77.0 (5900)            | 23.0 (1762)                    |          | 78.7 (6028)            | 21.3 (1634)                    |          |
| Age bracket                       | 14-15y                                        | 95.1 (7252)                         | 4.9 (370)                  | <0.001   | 66.9 (5097)             | 33.1 (2525)                     | <0.001   | 82.8 (6314)            | 17.2 (1308)                    | <0.001   | 89.2 (6802)            | 10.8 (820)                     | <0.001   |
|                                   | 16-17y                                        | 92.0 (7338)                         | 8.0 (642)                  |          | 42.9 (3425)             | 57.1 (4555)                     |          | 66.4 (5299)            | 33.6 (2681)                    |          | 74.9 (5978)            | 25.1 (2002)                    |          |
| Weekly income (€)                 | 0                                             | 97.0 (2795)                         | 3.0 (87)                   | <0.001   | 71.3 (2054)             | 28.7 (828)                      | <0.001   | 87.4 (2520)            | 12.6 (362)                     | <0.001   | 90.5 (2608)            | 9.5 (274)                      | <0.001   |
|                                   | 1-30                                          | 93.9 (10142)                        | 6.1 (656)                  |          | 53.3 (5752)             | 46.7 (5046)                     |          | 73.7 (7953)            | 26.3 (2845)                    |          | 81.7 (8819)            | 18.3 (1979)                    |          |
|                                   | 31-100                                        | 87.9 (1406)                         | 12.1 (193)                 |          | 37.5 (600)              | 62.5 (999)                      |          | 59.2 (946)             | 40.8 (653)                     |          | 70.9 (1134)            | 29.1 (465)                     |          |
|                                   | 100 or more                                   | 76.5 (247)                          | 23.5 (76)                  |          | 35.9 (116)              | 64.1 (207)                      |          | 60.1 (194)             | 39.9 (129)                     |          | 67.8 (219)             | 32.2 (104)                     |          |
| Level of economic dissatisfaction | Very satisfied or satisfied                   | 93.5 (9652)                         | 6.5 (667)                  | 0.003    | 55.8 (5758)             | 44.2 (4561)                     | <0.001   | 76.9 (7933)            | 23.1 (2386)                    | <0.001   | 84.2 (8691)            | 15.8 (1628)                    | <0.001   |
|                                   | Neither satisfied nor dissatisfied            | 93.9 (4235)                         | 6.1 (273)                  |          | 53.4 (2406)             | 46.6 (2102)                     |          | 70.9 (3194)            | 29.1 (1314)                    |          | 78.5 (3537)            | 21.5 (971)                     |          |
|                                   | Dissatisfied or very dissatisfied             | 90.7 (703)                          | 9.3 (72)                   |          | 46.2 (358)              | 53.8 (417)                      |          | 62.7 (486)             | 37.3 (289)                     |          | 71.2 (552)             | 28.8 (223)                     |          |
|                                   | Both have a university degree                 | 93.9 (7147)                         | 6.1 (468)                  | 0.001    | 53.4 (4069)             | 46.6 (3546)                     | 0.063    | 75.3 (5737)            | 24.7 (1878)                    | 0.001    | 81.4 (6202)            | 18.6 (1413)                    | 0.067    |
| Parents' education                | At least one has a university degree          | 92.8 (661)                          | 7.2 (51)                   |          | 56.0 (399)              | 44.0 (313)                      |          | 74.2 (528)             | 25.8 (184)                     |          | 80.9 (576)             | 19.1 (136)                     |          |
|                                   | At least one has a high school degree         | 93.8 (3260)                         | 6.2 (217)                  |          | 52.5 (1824)             | 47.5 (1653)                     |          | 72.4 (2519)            | 27.6 (958)                     |          | 80.5 (2800)            | 19.5 (677)                     |          |
|                                   | Both have elementary or middle school diploma | 91.7 (2688)                         | 8.3 (242)                  |          | 55.4 (1623)             | 44.6 (1307)                     |          | 72.3 (2119)            | 27.7 (811)                     |          | 83.1 (2434)            | 16.9 (496)                     |          |

|                      |                                                      | GAMBLING                                      |                                  |          | ALCOHOL INTAKE                |                                          |          | SMOKING                      |                                         |          | CANNABIS CONSUMPTION         |                                         |          |
|----------------------|------------------------------------------------------|-----------------------------------------------|----------------------------------|----------|-------------------------------|------------------------------------------|----------|------------------------------|-----------------------------------------|----------|------------------------------|-----------------------------------------|----------|
|                      |                                                      | Non-gamblers<br>+ non-<br>problem<br>gamblers | At risk +<br>problem<br>gamblers | <i>p</i> | Never in<br>previous<br>month | At least<br>once in<br>previous<br>month | <i>p</i> | Never in<br>previous<br>year | At least<br>once in<br>previous<br>year | <i>p</i> | Never in<br>previous<br>year | At least<br>once in<br>previous<br>year | <i>p</i> |
|                      |                                                      | % (n)                                         | % (n)                            |          | % (n)                         | % (n)                                    |          | % (n)                        | % (n)                                   |          | % (n)                        | % (n)                                   |          |
| Maternal<br>employm  | Not working                                          | 93.0 (4344)                                   | 7.0 (326)                        | 0.095    | 58.4 (2728)                   | 41.6 (1942)                              | <0.001   | 77.6 (3623)                  | 22.4 (1047)                             | <0.001   | 85.5 (3995)                  | 14.5 (675)                              | <0.001   |
|                      | Working                                              | 93.7 (10046)                                  | 6.3 (671)                        |          | 52.9 (5664)                   | 47.1 (5053)                              |          | 73.0 (7822)                  | 27.0 (2895)                             |          | 80.4 (8612)                  | 19.6 (2105)                             |          |
| Paternal<br>employ   | Not working                                          | 92.0 (1030)                                   | 8.0 (89)                         | 0.042    | 56.9 (637)                    | 43.1 (482)                               | 0.081    | 73.1 (818)                   | 26.9 (301)                              | 0.221    | 80.6 (902)                   | 19.4 (217)                              | 0.188    |
|                      | Working                                              | 93.6 (13093)                                  | 6.4 (894)                        |          | 54.2 (7585)                   | 45.8 (6402)                              |          | 74.8 (10456)                 | 25.2 (3531)                             |          | 82.2 (11494)                 | 17.8 (2493)                             |          |
| Parental<br>death    | Both parents<br>alive                                | 93.6 (14325)                                  | 6.4 (986)                        | 0.087    | 54.6 (8364)                   | 45.4 (6947)                              | 0.910    | 74.6 (11419)                 | 25.4 (3892)                             | 0.002    | 82.0 (12558)                 | 18.0 (2753)                             | 0.012    |
|                      | At least one<br>deceased<br>parent                   | 91.1 (265)                                    | 8.9 (26)                         |          | 54.3 (158)                    | 45.7 (133)                               |          | 66.7 (194)                   | 33.3 (97)                               |          | 76.3 (222)                   | 23.7 (69)                               |          |
| Geographical<br>area | Northern Italy                                       | 95.6 (6253)                                   | 4.4 (290)                        | <0.001   | 54.8 (3585)                   | 45.2 (2958)                              | 0.268    | 75.8 (4960)                  | 24.2 (1583)                             | <0.001   | 81.7 (5343)                  | 18.3 (1200)                             | <0.001   |
|                      | Central Italy                                        | 92.7 (2709)                                   | 7.3 (214)                        |          | 55.7 (1628)                   | 44.3 (1295)                              |          | 71.9 (2102)                  | 28.1 (821)                              |          | 79.1 (2312)                  | 20.9 (611)                              |          |
|                      | Southern Italy<br>and Isles                          | 91.7 (5628)                                   | 8.3 (508)                        |          | 53.9 (3309)                   | 46.1 (2827)                              |          | 74.2 (4551)                  | 25.8 (1585)                             |          | 83.5 (5125)                  | 16.5 (1011)                             |          |
| Type of school       | Grammar or<br>scientific high<br>school "licei"      | 95.7 (7725)                                   | 4.3 (346)                        | <0.001   | 58.0 (4682)                   | 42.0 (3389)                              | <0.001   | 77.0 (6215)                  | 23.0 (1856)                             | <0.001   | 83.5 (6741)                  | 16.5 (1330)                             | <0.001   |
|                      | Vocational<br>technical or<br>professional<br>school | 91.2 (6865)                                   | 8.8 (666)                        |          | 51.0 (3840)                   | 49.0 (3691)                              |          | 71.7 (5398)                  | 28.3 (2133)                             |          | 80.2 (6039)                  | 19.8 (1492)                             |          |

**Table 2:** Bivariate associations between different health-risk behaviors.

|                      |                                     | ALCOHOL INTAKE              |                                     |          | SMOKING                    |                                    |          | CANNABIS CONSUMPTION       |                                    |          | GAMBLING                            |                            |          |
|----------------------|-------------------------------------|-----------------------------|-------------------------------------|----------|----------------------------|------------------------------------|----------|----------------------------|------------------------------------|----------|-------------------------------------|----------------------------|----------|
|                      |                                     | Never in the previous month | At least once in the previous month | <i>p</i> | Never in the previous year | At least once in the previous year | <i>p</i> | Never in the previous year | At least once in the previous year | <i>p</i> | Non-gamblers + non-problem gamblers | At risk + problem gamblers | <i>p</i> |
|                      |                                     | % (n)                       | % (n)                               |          | % (n)                      | % (n)                              |          | % (n)                      | % (n)                              |          | % (n)                               | % (n)                      |          |
| ALCOHOL INTAKE       | Never in the previous month         |                             |                                     |          | 88.8 (7571)                | 11.2 (951)                         | <0.001   | 93.3 (7949)                | 6.7 (573)                          | <0.001   | 97.2 (8283)                         | 2.8 (239)                  | <0.001   |
|                      | At least once in the previous month |                             |                                     |          | 57.1 (4042)                | 42.9 (3038)                        |          | 68.2 (4831)                | 31.8 (2249)                        |          | 89.1 (6307)                         | 10.9 (773)                 |          |
| SMOKING              | Never in the previous year          |                             |                                     |          |                            |                                    |          | 93.7 (10886)               | 6.3 (727)                          | <0.001   | 95.1 (11049)                        | 4.9 (564)                  | <0.001   |
|                      | At least once in the previous year  |                             |                                     |          |                            |                                    |          | 47.5 (1894)                | 52.5 (2095)                        |          | 88.8 (3541)                         | 11.2 (448)                 |          |
| CANNABIS CONSUMPTION | Never in the previous year          |                             |                                     |          |                            |                                    |          |                            |                                    |          | 95.3 (12174)                        | 4.7 (606)                  | <0.001   |
|                      | At least once in the previous year  |                             |                                     |          |                            |                                    |          |                            |                                    |          | 85.6 (2416)                         | 14.4 (406)                 |          |

## DISCUSSION

The present study illustrates the pathway linking health-risk behaviors with demographic and socio-economic factors. The findings indicate that nearly one in two underage school students had had at least one alcoholic drink in the previous month, that one in four smoked, nearly one in five had consumed cannabis in the previous year, and one in fifteen could be defined as an at risk or problem gambler. These prevalence data are consistent with previous research[23]. The particular geographical distribution of the odds ratios for the prevalence of different health-risk behaviors in Italy was also in line with official records[24,25], with gambling more prevalent among students in south, and cannabis consumption more common among students in the north.

On the associations between different types of health-risk behavior, this study highlighted that gambling is associated with alcohol and cannabis consumption, even after controlling for socio-economic and demographic factors. The higher prevalence of multiple health-risk behaviors among young gamblers is a commonly recognized problem[26]. For instance, data from a U.S. sample of 2,274 young people aged 14 to 21 years showed that alcohol, tobacco and marijuana use, and conduct disorder are strong independent predictors of gambling[26]. **Error! Bookmark not defined.** This supports the concept that substance abuse and gambling behavior are part of a more general problem behavior syndrome associated with conduct disorder[26]. This concept suggests that, as one type of adolescent problem behavior increases, the likelihood of other problem behaviors developing increases too, and the co-occurrence of problem behaviors suggests that they have antecedent explanatory factors in common[26]. The tendency of some adolescents to adopt multiple health-risk behaviors could be explained by the “gateway hypothesis”[27,28], according to which an adolescent’s early experimentation with alcohol or tobacco or cannabis can escalate to more addictive illicit drug use[29].

1  
2  
3 As regards the economic factors, a higher weekly income was positively associated with all the health-  
4 risk behaviors considered in this study, with the exception of cannabis consumption. Consistently with  
5 this finding, a New Zealand survey on a sample of secondary school students of the same age as our  
6 sample (14-17 years old) revealed that the proportion of students with part-time jobs, and consequently  
7 more money, was associated with a greater consumption of alcohol, cigarettes and gambling[30]. These  
8 results suggest that having access to more money could increase an adolescent's chances of engaging in  
9 health-risk behaviors[30]. In fact, previous research found that demand for substances is price-  
10 sensitive[31,32]: following the demand model for goods and services, adolescents with higher disposable  
11 incomes could also be at higher risk of substance use because they have more financial resources to  
12 purchase alcohol[33], or other addictive substances[34,35]. It would be worth considering intervention  
13 designed to provide young people with guidance on the use of their discretionary income[30], alongside  
14 approaches that steer parents to limit the amount of money they give to their children unless they have a  
15 clear picture of how it is being spent.

16  
17 Our study also revealed that economic dissatisfaction was associated with alcohol, smoking and cannabis  
18 use, but not with gambling behavior. In line with our results, a meta-analysis[36] on marijuana and  
19 alcohol use by SES in adolescents aged 10-15 years found that the prevalence of marijuana and alcohol  
20 consumption was 22% higher in adolescents with a lower SES than in those with a higher SES. A possible  
21 explanation for this could come from strain theory[37], according to which coming from a relatively poor  
22 family (like failing at school) can be as a source of dissatisfaction that promotes potential health-risk  
23 behavior, including substance use, as a way to gain respect when ordinary social valuations are  
24 impossible[38]. In the light of these findings, it would be desirable for public health prevention strategies  
25 to focus most on the more deprived populations in order to prevent the spread of social inequalities,  
26 which might even be further aggravated by untargeted prevention schemes.

1  
2  
3 As for the social context, this study found maternal employment positively associated with alcohol and  
4 cannabis consumption, and smoking in adolescence. A possible explanation for this could lie in that  
5 working mothers generally spend less time at home, and might monitor their children less effectively.  
6  
7 Previous studies have shown an increased risk of tobacco and alcohol use among adolescents who  
8 experience less parental supervision due to their absence from home[39]. In fact, parental monitoring,  
9 which incorporates parent-youth communication, and youth supervision by parents or guardians, seems  
10 to be especially influential in its association with adolescent involvement in health-risk behaviors, both  
11 delaying the onset of such behaviors among naive adolescents, and containing them among adolescents  
12 already practicing them[40,41].  
13  
14  
15  
16  
17  
18  
19  
20  
21  
22  
23  
24  
25

26 Our study highlighted a major risk of smoking in adolescents who had experienced a parent's death.  
27 Other authors[42] examined the impact of exposure to family adversity (including parental death,  
28 parental conflict, parental absence from home, and divorce) on the timing of smoking initiation, using  
29 data from a longitudinal panel study. The four types of family adversity examined were all associated  
30 with a higher risk of smoking, but losing a parent had the greatest impact on the initiation of smoking.  
31 There is substantial evidence of these adverse experiences having a deleterious impact on a child's  
32 developmental, behavioral, psychosocial, and physical outcomes[43]. Adolescents, in particular, may try  
33 substance use in an effort to cope with their stress, as posited by stress-coping theory[44]. In parallel,  
34 social learning theory suggests that people who face more adversity tend to have parents or close friends  
35 who are themselves substance users[45,46], and are consequently at higher risk of substance use  
36 themselves.  
37  
38  
39  
40  
41  
42  
43  
44  
45  
46  
47  
48  
49  
50  
51  
52

53 The findings of this study emphasize the fact that health-risk behaviors are more likely in population  
54 subgroups characterized by certain socio-economic variables. It would therefore be useful to design  
55  
56  
57  
58  
59  
60

1  
2  
3 selective prevention measures (program designed for at risk groups) as well as the recommended  
4 universal approaches (program designed for overall target population such as students) and indicated  
5 ones (programs designed for people who are already experimenting with drugs)[47]. A good example of  
6 a successfully-implemented prevention scheme is the Adolescent Transitions Program (ATP)[48]: this is  
7 a school-based program that uses a tiered approach to provide prevention services for students in middle  
8 school and junior high school, and their parents. A general intervention, intended for parents of all  
9 students in a school, establishes a Family Resource Room to engage parents, establish norms for  
10 parenting practices, and disseminate information about the risks of problem behavior and substance use  
11 in adolescence. A selective intervention level, called the Family Check-Up, offers family assessments  
12 and professional support to identify families at risk of problem behavior and substance use. The indicated  
13 level, the Parent Focus curriculum, provides direct professional support to help parents make the changes  
14 indicated by the Family Check-Up. The services may include behavioral family therapy, parenting  
15 groups, or case management services[47]. The longitudinal effects of the ATP through middle school  
16 and the first year of high school have been analyzed and shown that random assignments to the school-  
17 based ATP were associated with a lower incidence of substance use by the first year of high school, even  
18 after controlling for prior substance use in middle school[48].  
19  
20  
21  
22  
23  
24  
25  
26  
27  
28  
29  
30  
31  
32  
33  
34  
35  
36  
37  
38  
39  
40  
41

## 42 **Limitations**

43  
44 This study has a number of limitations, primarily relating to the fact that our data were obtained from a  
45 sample of adolescents attending school. This means that those who dropped out of school at 16 years old  
46 (on completing their compulsory education in Italy) were not considered, so our sample was only  
47 representative of Italian school students. A second limitation lies in that our findings are based on self-  
48 reports and may be biased by respondents' under- or over-reporting of their risk-taking behavior. To  
49 mitigate this potential bias, we guaranteed respondents' anonymity and confidentiality.  
50  
51  
52  
53  
54  
55  
56  
57  
58  
59  
60

## Conclusions

This is one of the first studies to analyze the explanatory pathway connecting health-risk behaviors (such as gambling, alcohol drinking, smoking and cannabis consumption) with demographic and socio-economic factors in adolescence. Clarifying the various determinants of the worrying phenomena of substance use and gambling in this age group is fundamental to the design of appropriate public health strategies and prevention measures in order to address and contain these widespread issues.



1  
2  
3  
4  
5  
6  
7  
8  
9  
10  
11  
12  
13  
14  
15  
16  
17  
18  
19  
20  
21  
22  
23  
24  
25  
26  
27  
28  
29  
30  
31  
32  
33  
34  
35  
36  
37  
38  
39  
40  
41  
42  
43  
44  
45  
46  
47  
48  
49  
50  
51  
52  
53  
54  
55  
56  
57  
58  
59  
60

For peer review only

## REFERENCES

- 1 Molinaro S, Canale N, Vieno A, et al. Country- and individual level determinants of probable problematic gambling in adolescence: A multi-level cross-national comparison. *Addiction* 2014;109(12):2089–97. <http://dx.doi.org/10.1111/add.12719>.
- 2 Gutierrez A, Sher L. Alcohol and drug use among adolescents: an educational overview. *Int J Adolesc Med Health* 2015;27(2):207-12. doi: 10.1515/ijamh-2015-5013.
- 3 American Psychiatric Association. Diagnostic and Statistical Manual of Mental Disorders. 5th edn. Arlington, VA: American Psychiatric Publishing 2013.
- 4 Jackson KM, Sher KJ, Schulenberg JE. Conjoint developmental trajectories of young adult alcohol and tobacco use. *J Abnorm Psychol* 2005;114(4):612-26.
- 5 Chambers RA, Potenza MN. Neurodevelopment, impulsivity, and adolescent gambling. *J Gambl Stud* 2003;19(1):53-84.
- 6 McGrath DS, Barrett SP. The comorbidity of tobacco smoking and gambling: A review of the literature. *Drug Alcohol Rev* 2009;28(6):676-81. doi: 10.1111/j.1465-3362.2009.00097.x.
- 7 Tackett JL, Krieger H, Neighbors C, et al. Comorbidity of alcohol and gambling problems in emerging adults: A bifactor model conceptualization. *J Gambl Stud* 2017;33(1):131-47. doi: 10.1007/s10899-016-9618-6.
- 8 Cunningham-Williams RM, Cottler LB, Compton WM, et al. Taking chances: Problem gamblers and mental health disorders - Results from the St. Louis Epidemiologic Catchment Area Study. *Am J Public Health* 1998;88(7):1093-6.
- 9 Crockford DN, el-Guebaly N. Psychiatric comorbidity in pathological gambling: A critical review. *Can J Psychiatry* 1998;43(1):43-50.
- 10 Crounce JM, Corbin WR. Effects of alcohol and initial gambling outcomes on within-session gambling behavior. *Exp Clin Psychopharmacol* 2010;18(2):145-57. doi: 10.1037/a0019114.

- 1  
2  
3 11 Soteriades ES, DiFranza JR. Parent's socioeconomic status, adolescents' disposable income, and  
4 adolescents' smoking status in Massachusetts. *Am J Public Health* 2003;93(7):1155-60.  
5  
6  
7 12 Wen M, Van Duker H, Olson LM. Social contexts of regular smoking in adolescence: Towards a  
8 multidimensional ecological model. *J Adolesc* 2009;32(3):671-92. doi:  
9 10.1016/j.adolescence.2008.06.008.  
10  
11  
12 13 Welte JW, Barnes GM, Tidwell MC, et al. The prevalence of problem gambling among U.S.  
13 adolescents and young adults: Results from a national survey. *J Gambl Stud* 2007;24(2):119-33.  
14  
15 14 Kristiansen SG, Jensen SM. Prevalence and correlates of problematic gambling among Danish  
16 adolescents. *Int J Soc Welfare* 2014;23:89-99.  
17  
18 15 Blinn-Pike L, Worthy SL, Jonkman JN. Adolescent gambling: A review of an emerging field of  
19 research. *J Adolesc Health* 2010;47(3):223-36. doi: 10.1016/j.jadohealth.2010.05.003.  
20  
21 16 Martins SS, Storr CL, Lee GP, Ialongo NS. Environmental influences associated with gambling in  
22 young adulthood. *J Urban Health* 2013;90(1):130-40.  
23  
24 17 Buja A, Lion C, Scioni M, et al. SOGS-RA gambling scores and substance use in adolescents. *J Behav*  
25 *Addict* 2017;6(3):425-433. doi: 10.1556/2006.6.2017.043.  
26  
27 18 Barnes GM, Welte JW, Hoffman JH, et al. Gambling and alcohol use among youth: Influences of  
28 demographic, socialization, and individual factors. *Addict Behav* 1999;24(6):749-67.  
29  
30 19 Winters KC, Stinchfield RD, Fulkerson J. Toward the development of an adolescent gambling  
31 problem severity scale. *J Gambl Stud* 1993;9(1):63-84.  
32  
33 20 Poulin C. An assessment of the validity and reliability of the SOGS-RA. *J Gambl Stud* 2002;18(1):67-  
34 93.  
35  
36 21 Muthen LK, Muthen BO. Mplus User's Guide. 5th edn. Los Angeles, CA: Muthen & Muthen 1998-  
37 2009.  
38  
39  
40  
41  
42  
43  
44  
45  
46  
47  
48  
49  
50  
51  
52  
53  
54  
55  
56  
57  
58  
59  
60

- 1  
2  
3 22 Kline RB. Principles and practice of structural equation modeling. 3rd edn. New York, NY: Guilford  
4 Press 2010.  
5  
6  
7 23 Caldeira KM, Arria AM, O'Grady KE, et al. Risk factors for gambling and substance use among recent  
8 college students. *Drug Alcohol Depend* 2017;179:280-90. doi: 10.1016/j.drugalcdep.2017.06.024.  
9  
10 24 [https://www.epid.ifc.cnr.it/images/downloads/Report/Gioco/Consumi\\_azzardo\\_2017.pdf](https://www.epid.ifc.cnr.it/images/downloads/Report/Gioco/Consumi_azzardo_2017.pdf) (accessed  
11 16 Apr 2019).  
12  
13 25 [http://www.politicheantidroga.gov.it/media/2153/relazione-al-parlamento\\_2017.pdf](http://www.politicheantidroga.gov.it/media/2153/relazione-al-parlamento_2017.pdf) (accessed 16  
14 Apr 2019)  
15  
16 26 Barnes GM, Welte JW, Hoffman JH, et al. The co-occurrence of gambling with substance use and  
17 conduct disorder among youth in the US. *Am J Addict* 2011;20:166–173.  
18  
19 27 Kandel D. Stages in adolescent involvement in drug use. *Science* 1975;190(4217):912-4.  
20  
21 28 Kandel DP, Faust R. Sequence and stages in patterns of adolescent drug use. *Arch Gen Psychiatry*  
22 1975;32(7):923-32.  
23  
24 29 Lynskey MT, Heath AC, Bucholz KT. Escalation of drug use in early-onset cannabis users vs co-twin  
25 controls. *JAMA* 2003;289(4):427-33.  
26  
27 30 Darling H, Reeder AI, McGee R, et al. Brief report: Disposable income, and spending on fast food,  
28 alcohol, cigarettes, and gambling by New Zealand secondary school students. *J Adolesc* 2006;29(5):837-  
29 43.  
30  
31 31 Farrell S, Manning WG, Finch M. Alcohol dependence and the price of alcoholic beverages. *J Health*  
32 *Econ* 2003;22(1):117-47.  
33  
34 32 Keeler T, Hu T, Barnett P, et al. Do cigarette producers price-discriminate by state? An empirical  
35 analysis of local cigarette pricing and taxation. *J Health Econ* 1996;15(4):499-512.  
36  
37 33 Bellis MA, Hughes K, Morleo M, et al. Predictors of risky alcohol consumption in schoolchildren and  
38 their implications for preventing alcohol-related harm. *Subst Abuse Treat Prev Policy* 2007;2:15.  
39  
40  
41  
42  
43  
44  
45  
46  
47  
48  
49  
50  
51  
52  
53  
54  
55  
56  
57  
58  
59  
60

- 1  
2  
3 34 Arillo-Santillan E, Lazcano-Ponce E, Hernandez-Avila M, et al. Associations between individual and  
4 contextual factors and smoking in 13,293 Mexican students. *Am J Prev Med* 2005;28(1):41-51.  
5  
6  
7 35 Humensky JL. Are adolescents with high socioeconomic status more likely to engage in alcohol and  
8 illicit drug use in early adulthood? *Subst Abuse Treat Prev Policy* 2010;5:19. doi: 10.1186/1747-597X-  
9 5-19.  
10  
11  
12  
13  
14 36 Lemstra M, Bennett NR, Neudorf C, et al. A meta-analysis of marijuana and alcohol use by socio-  
15 economic status in adolescents aged 10-15 years. *Can J Public Health* 2008;99(3):172-7.  
16  
17  
18  
19 37 Agnew R, White H. An empirical test of general strain theory. *Criminology* 1992;30:475-99  
20  
21  
22 38 Legleye S, Janssen E, Beck F, et al. Social gradient in initiation and transition to daily use of tobacco  
23 and cannabis during adolescence: a retrospective cohort study. *Addiction* 2011;106(8):1520-31. doi:  
24 10.1111/j.1360-0443.2011.03447.x.  
25  
26  
27  
28 39 Lacey RE, Zilanawala A, Webb E, et al. Parental absence in early childhood and onset of smoking  
29 and alcohol consumption before adolescence. *Arch Dis Child* 2018;103(7):691-694. doi:  
30 10.1136/archdischild-2016-310444.  
31  
32  
33  
34 40 Steinberg L, Fletcher A, Darling N. Parental monitoring and peer influences on adolescent substance  
35 use. *Pediatrics* 1994;93(6 Pt 2):1060-4.  
36  
37  
38  
39 41 Li X, Stanton B, Feigelman S. Impact of perceived parental monitoring on adolescent risk behavior  
40 over 4 years. *J Adolesc Health* 2000;27(1):49-56.  
41  
42  
43  
44 42 Hsu YT, Kawachi I. Timing of family adversity during adolescence and its impact on alcohol and  
45 tobacco initiation: a longitudinal study among Taiwanese adolescents. *Child Psychiatry Hum Dev*  
46 2019;50(2):257-67. doi: 10.1007/s10578-018-0838-0.  
47  
48  
49  
50 43 Shonkoff JP, Garner AS. Committee on Psychosocial Aspects of Child and Family Health; et al. The  
51 lifelong effects of early childhood adversity and toxic stress. *Pediatrics* 2012;129(1):e232-46. doi:  
52 10.1542/peds.2011-2663.  
53  
54  
55  
56  
57  
58  
59  
60

1  
2  
3 44 Sudraba V, Millere A, Deklava L, et al. Stress coping strategies of drug and alcohol addicted patients  
4  
5 in Latvia. *Proc Soc Behav Sci* 2015;205:632-636.  
6

7 45 Anda RF, Whitfield CL, Felitti VJ, et al. Adverse childhood experiences, alcoholic parents, and later  
8  
9 risk of alcoholism and depression. *Psychiatr Serv* 2002;53(8):1001-9.  
10

11 46 Dube SR, Felitti VJ, Dong M, et al. Childhood abuse, neglect, and household dysfunction and the risk  
12  
13 of illicit drug use: the Adverse Childhood Experiences study. *Pediatrics* 2003;111(3):564-72.  
14

15 47 Robertson EB, David SL, Rao SA. Preventing drug use among children and adolescents. A research-  
16  
17 based guide for parents, educators, and community leaders. 2nd edn. Bethesda, MD: US Department of  
18  
19 Health and Human Services, National Institute on Drug Abuse 2003 NIH Publication no 04-4212(A).  
20  
21

22 48 Dishion TJ, Kavanagh K, Schneiger A, et al. Preventing early adolescent substance use: A family-  
23  
24 centered strategy for the public middle school. *Prev Sci* 2002;3(3):191-201.  
25  
26  
27  
28  
29  
30  
31  
32  
33  
34  
35  
36  
37  
38  
39  
40  
41  
42  
43  
44  
45  
46  
47  
48  
49  
50  
51  
52  
53  
54  
55  
56  
57  
58  
59  
60

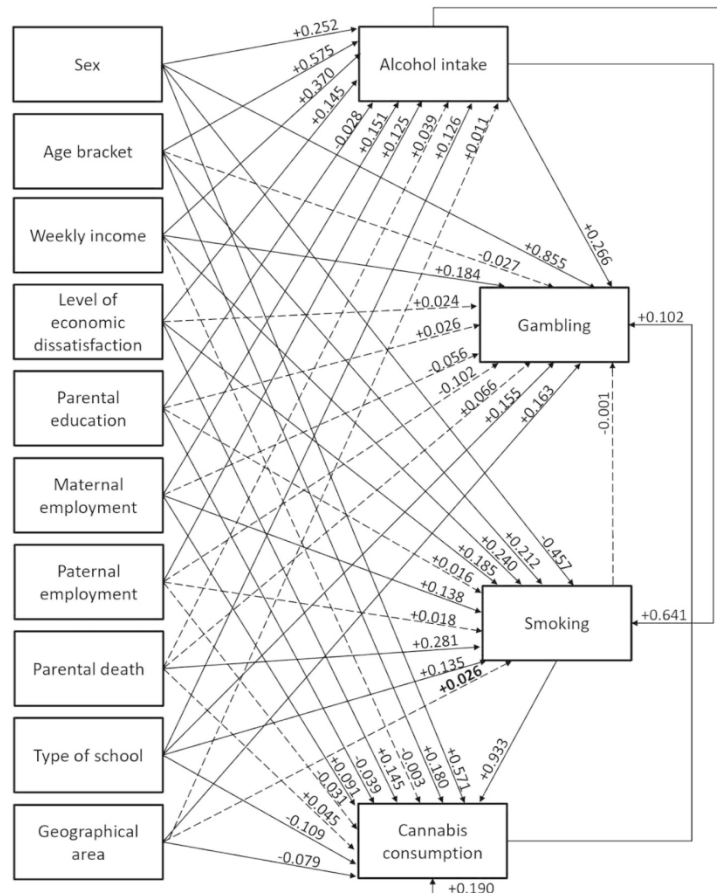

Figure 1: pathway analysis of associations between gambling, substance use, and demographic and socio-economic factors.

599x776mm (72 x 72 DPI)

STROBE 2007 (v4) Statement—Checklist of items that should be included in reports of *cross-sectional studies*

| Section/Topic                | Item # | Recommendation                                                                                                                                                                       | Reported on page # |
|------------------------------|--------|--------------------------------------------------------------------------------------------------------------------------------------------------------------------------------------|--------------------|
| Title and abstract           | 1      | (a) Indicate the study's design with a commonly used term in the title or the abstract                                                                                               | 1                  |
|                              |        | (b) Provide in the abstract an informative and balanced summary of what was done and what was found                                                                                  | 5                  |
| Introduction                 |        |                                                                                                                                                                                      |                    |
| Background/rationale         | 2      | Explain the scientific background and rationale for the investigation being reported                                                                                                 | 7                  |
| Objectives                   | 3      | State specific objectives, including any prespecified hypotheses                                                                                                                     | 8                  |
| Methods                      |        |                                                                                                                                                                                      |                    |
| Study design                 | 4      | Present key elements of study design early in the paper                                                                                                                              | 9, 10, 11          |
| Setting                      | 5      | Describe the setting, locations, and relevant dates, including periods of recruitment, exposure, follow-up, and data collection                                                      | 9, 10              |
| Participants                 | 6      | (a) Give the eligibility criteria, and the sources and methods of selection of participants                                                                                          | 9, 10              |
| Variables                    | 7      | Clearly define all outcomes, exposures, predictors, potential confounders, and effect modifiers. Give diagnostic criteria, if applicable                                             | 10, 11             |
| Data sources/<br>measurement | 8*     | For each variable of interest, give sources of data and details of methods of assessment (measurement). Describe comparability of assessment methods if there is more than one group | 10, 11             |
| Bias                         | 9      | Describe any efforts to address potential sources of bias                                                                                                                            | 6, 21              |
| Study size                   | 10     | Explain how the study size was arrived at                                                                                                                                            | 9, 10              |
| Quantitative variables       | 11     | Explain how quantitative variables were handled in the analyses. If applicable, describe which groupings were chosen and why                                                         | 10, 11             |
| Statistical methods          | 12     | (a) Describe all statistical methods, including those used to control for confounding                                                                                                | 11, 12             |
|                              |        | (b) Describe any methods used to examine subgroups and interactions                                                                                                                  | 11, 12             |
|                              |        | (c) Explain how missing data were addressed                                                                                                                                          | /                  |
|                              |        | (d) If applicable, describe analytical methods taking account of sampling strategy                                                                                                   | 11, 12             |
|                              |        | (e) Describe any sensitivity analyses                                                                                                                                                | 11, 12             |
| Results                      |        |                                                                                                                                                                                      |                    |



|                   |     |                                                                                                                                                                                                              |                |
|-------------------|-----|--------------------------------------------------------------------------------------------------------------------------------------------------------------------------------------------------------------|----------------|
| Participants      | 13* | (a) Report numbers of individuals at each stage of study—eg numbers potentially eligible, examined for eligibility, confirmed eligible, included in the study, completing follow-up, and analysed            | 13             |
|                   |     | (b) Give reasons for non-participation at each stage                                                                                                                                                         | /              |
|                   |     | (c) Consider use of a flow diagram                                                                                                                                                                           | /              |
| Descriptive data  | 14* | (a) Give characteristics of study participants (eg demographic, clinical, social) and information on exposures and potential confounders                                                                     | 13, 14         |
|                   |     | (b) Indicate number of participants with missing data for each variable of interest                                                                                                                          | /              |
| Outcome data      | 15* | Report numbers of outcome events or summary measures                                                                                                                                                         | 13             |
| Main results      | 16  | (a) Give unadjusted estimates and, if applicable, confounder-adjusted estimates and their precision (eg, 95% confidence interval). Make clear which confounders were adjusted for and why they were included | 13             |
|                   |     | (b) Report category boundaries when continuous variables were categorized                                                                                                                                    | 13             |
|                   |     | (c) If relevant, consider translating estimates of relative risk into absolute risk for a meaningful time period                                                                                             | /              |
| Other analyses    | 17  | Report other analyses done—eg analyses of subgroups and interactions, and sensitivity analyses                                                                                                               | 11, 12         |
| Discussion        |     |                                                                                                                                                                                                              |                |
| Key results       | 18  | Summarise key results with reference to study objectives                                                                                                                                                     | 18, 19, 20, 21 |
| Limitations       | 19  | Discuss limitations of the study, taking into account sources of potential bias or imprecision. Discuss both direction and magnitude of any potential bias                                                   | 21             |
| Interpretation    | 20  | Give a cautious overall interpretation of results considering objectives, limitations, multiplicity of analyses, results from similar studies, and other relevant evidence                                   | 18, 19, 20, 21 |
| Generalisability  | 21  | Discuss the generalisability (external validity) of the study results                                                                                                                                        | 20, 21, 22     |
| Other information |     |                                                                                                                                                                                                              |                |
| Funding           | 22  | Give the source of funding and the role of the funders for the present study and, if applicable, for the original study on which the present article is based                                                | 3              |

\*Give information separately for cases and controls in case-control studies and, if applicable, for exposed and unexposed groups in cohort and cross-sectional studies.

Note: An Explanation and Elaboration article discusses each checklist item and gives methodological background and published examples of transparent reporting. The STROBE checklist is best used in conjunction with this article (freely available on the Web sites of PLoS Medicine at <http://www.plosmedicine.org/>, Annals of Internal Medicine at <http://www.annals.org/>, and Epidemiology at <http://www.epidem.com/>). Information on the STROBE Initiative is available at [www.strobe-statement.org](http://www.strobe-statement.org).

# BMJ Open

## Pathways connecting socioeconomic variables, substance abuse and gambling behavior: a cross-sectional study on a sample of Italian high-school students.

|                                 |                                                                                                                                                                                                                                                                                                                                                                                                                                                                                                                                                                                                                                                                                                                                                                                                                                                                                                                                                                                                                                                  |
|---------------------------------|--------------------------------------------------------------------------------------------------------------------------------------------------------------------------------------------------------------------------------------------------------------------------------------------------------------------------------------------------------------------------------------------------------------------------------------------------------------------------------------------------------------------------------------------------------------------------------------------------------------------------------------------------------------------------------------------------------------------------------------------------------------------------------------------------------------------------------------------------------------------------------------------------------------------------------------------------------------------------------------------------------------------------------------------------|
| Journal:                        | <i>BMJ Open</i>                                                                                                                                                                                                                                                                                                                                                                                                                                                                                                                                                                                                                                                                                                                                                                                                                                                                                                                                                                                                                                  |
| Manuscript ID                   | bmjopen-2019-031737.R1                                                                                                                                                                                                                                                                                                                                                                                                                                                                                                                                                                                                                                                                                                                                                                                                                                                                                                                                                                                                                           |
| Article Type:                   | Original research                                                                                                                                                                                                                                                                                                                                                                                                                                                                                                                                                                                                                                                                                                                                                                                                                                                                                                                                                                                                                                |
| Date Submitted by the Author:   | 03-Sep-2019                                                                                                                                                                                                                                                                                                                                                                                                                                                                                                                                                                                                                                                                                                                                                                                                                                                                                                                                                                                                                                      |
| Complete List of Authors:       | Buja, Alessandra; University of Padua, Department of Cardiological, Thoracic, Vascular Sciences and Public Health<br>Mortali, Claudia; Istituto Superiore di Sanità, Centro Nazionale Dipendenze e Doping<br>Mastrobattista, Luisa; Istituto Superiore di Sanità, Centro Nazionale Dipendenze e Doping<br>Minutillo, Adele; Istituto Superiore di Sanità, Centro Nazionale Dipendenze e Doping<br>Pichini, Simona; Istituto Superiore di Sanità, Centro Nazionale Dipendenze e Doping<br>Genetti, Bruno; Explora Center for Research and Statistical Analysis<br>Vian, Paolo; Explora Center for Research and Statistical Analysis<br>Andreotti, Alessandra; Explora Center for Research and Statistical Analysis<br>Grotto, Giulia; University of Padua, Department of Cardiological, Thoracic, Vascular Sciences and Public Health<br>Baldo, Vincenzo; University of Padua, Department of Cardiological, Thoracic, Vascular Sciences and Public Health<br>Pacifci, Roberta; Istituto Superiore di Sanità, Centro Nazionale Dipendenze e Doping |
| <b>Primary Subject Heading</b>: | Public health                                                                                                                                                                                                                                                                                                                                                                                                                                                                                                                                                                                                                                                                                                                                                                                                                                                                                                                                                                                                                                    |
| Secondary Subject Heading:      | Paediatrics, Smoking and tobacco, Addiction                                                                                                                                                                                                                                                                                                                                                                                                                                                                                                                                                                                                                                                                                                                                                                                                                                                                                                                                                                                                      |
| Keywords:                       | PUBLIC HEALTH, adolescents, health-risk behaviors, substance, gambling                                                                                                                                                                                                                                                                                                                                                                                                                                                                                                                                                                                                                                                                                                                                                                                                                                                                                                                                                                           |
|                                 |                                                                                                                                                                                                                                                                                                                                                                                                                                                                                                                                                                                                                                                                                                                                                                                                                                                                                                                                                                                                                                                  |

SCHOLARONE™  
Manuscripts

1  
2  
3 **Pathways connecting socioeconomic variables,**  
4  
5  
6  
7  
8 **substance abuse and gambling behavior: a cross-**  
9  
10  
11  
12 **sectional study on a sample of Italian high-school**  
13  
14  
15  
16  
17 **students**  
18  
19  
20  
21  
22  
23

24 Alessandra Buja, Claudia Mortali, Luisa Mastrobattista, Adele Minutillo, Simona Pichini, Bruno Genetti,  
25  
26 Paolo Vian, Alessandra Andreotti, Giulia Grotto, Vincenzo Baldo, Roberta Pacifici  
27  
28  
29

30  
31 *Alessandra Buja*, Department of Cardiological, Thoracic, Vascular Sciences and Public Health,  
32  
33 University of Padua, Via Loredan 18, 35128 Padova (Italy). E-mail: [alessandra.buja@unipd.it](mailto:alessandra.buja@unipd.it)  
34

35 *Claudia Mortali*, Centro Nazionale Dipendenze e Doping, Istituto Superiore di Sanità, Viale Regina  
36  
37 Elena 299, 00161 Roma, Italy. E-mail: [claudia.mortali@iss.it](mailto:claudia.mortali@iss.it)  
38

39  
40 *Luisa Mastrobattista*, Centro Nazionale Dipendenze e Doping, Istituto Superiore di Sanità, Viale Regina  
41  
42 Elena 299, 00161 Roma, Italy. E-mail: [luisa.mastrobattista@iss.it](mailto:luisa.mastrobattista@iss.it)  
43

44  
45 *Adele Minutillo*, Centro Nazionale Dipendenze e Doping, Istituto Superiore di Sanità, Viale Regina Elena  
46  
47 299, 00161 Roma, Italy. E-mail: [adele.minutillo@iss.it](mailto:adele.minutillo@iss.it)  
48

49  
50 *Simona Pichini*, Centro Nazionale Dipendenze e Doping, Istituto Superiore di Sanità, Viale Regina Elena  
51  
52 299, 00161 Roma, Italy. E-mail: [simona.pichini@iss.it](mailto:simona.pichini@iss.it)  
53

54  
55 *Bruno Genetti*, Explora Center for Research and Statistical Analysis, Vigodarzere (PD), Italy. E-mail:  
56  
57 [bruno.genetti@centroexplora.it](mailto:bruno.genetti@centroexplora.it)  
58  
59

1  
2  
3 *Paolo Vian*, Explora Center for Research and Statistical Analysis, Vigodarzere (PD), Italy. E-mail:

4 [paolo.vian@centroexplora.it](mailto:paolo.vian@centroexplora.it)

5  
6  
7  
8 *Alessandra Andreotti*, Explora Center for Research and Statistical Analysis, Vigodarzere (PD), Italy. E-

9  
10  
11  
12  
13  
14  
15  
16  
17  
18  
19  
20  
21  
22  
23  
24  
25  
26  
27  
28  
29  
30  
31  
32  
33  
34  
35  
36  
37  
38  
39  
40  
41  
42  
43  
44  
45  
46  
47  
48  
49  
50  
51  
52  
53  
54  
55  
56  
57  
58  
59  
60  
mail: [alessandra.andreotti@centroexplora.it](mailto:alessandra.andreotti@centroexplora.it)

12 *Giulia Grotto*, Department of Cardiological, Thoracic, Vascular Sciences and Public Health, University  
13 of Padua, Via Loredan 18, 35128 Padova (Italy). E-mail: [giulia.grotto.1@studenti.unipd.it](mailto:giulia.grotto.1@studenti.unipd.it)

17 *Vincenzo Baldo*, Department of Cardiological, Thoracic, Vascular Sciences and Public Health,  
18 University of Padua, Via Loredan 18, 35128 Padova (Italy). E-mail: [vincenzo.baldo@unipd.it](mailto:vincenzo.baldo@unipd.it)

21 *Roberta Pacifici*, Centro Nazionale Dipendenze e Doping, Istituto Superiore di Sanità, Viale Regina  
22 Elena 299, 00161 Roma, Italy. E-mail: [roberta.pacifici@iss.it](mailto:roberta.pacifici@iss.it)

28  
29  
30  
31  
32  
33  
34  
35  
36  
37  
38  
39  
40  
41  
42  
43  
44  
45  
46  
47  
48  
49  
50  
51  
52  
53  
54  
55  
56  
57  
58  
59  
60  
**Address correspondence to:**

*Alessandra Buja*,

*Department of Cardiological, Thoracic, Vascular Sciences and Public Health, University of Padova,*  
*Via Loredan 18, 35128 Padova (ITALY).*

*E-mail: [alessandra.buja@unipd.it](mailto:alessandra.buja@unipd.it); tel 049/8275387; fax 049/8275392*

**Word count:** 3,186

## DECLARATIONS

### Competing interests

The authors have no competing interests to disclose.

### Ethical approval and consent to participation

This study was approved by the ethics committee of the Italian National Health Institute. The study complied with the Declaration of Helsinki and with Italian Law n. 196/2003 on the protection of personal data. The questionnaires were anonymous, with no chance of individuals being identifiable.

Consent to the students' participation was required first from the school director, then all parents signed to their consent to the minors' participation in the survey.

### Funding

The study was sponsored and financed by the *Agenzia delle Dogane e dei Monopoli dello Stato*. The agency had no role in the design of the study, the collection, analysis, and interpretation of the data, the writing of the manuscript, or the decision to submit the paper for publication.

### Data sharing

The data analysis was performed on anonymized aggregate data with no chance of individuals being identifiable. Permission to use unidentifiable individual data extracted from administrative databases was granted by National Health Institute. The data are owned by National Health Institute. Requests for data can be made to the "Osservatorio Fumo, Alcol e Droga" of the National Health Institute at [claudia.mortali@iss.it](mailto:claudia.mortali@iss.it).

### Authors' contributions

Alessandra Buja conceptualized the study, interpreted the data, and drafted the manuscript.

Claudia Mortali obtained funding, coordinated all study phases, and approved the final manuscript as submitted.

Luisa Mastrobattista was involved in planning and supervising the work, and approved the final manuscript as submitted.

Adele Minutillo was involved in planning and supervising the work, and approved the final manuscript as submitted.

Simona Pichini conceived, designed and directed the project.

Bruno Genetti designed the data collection tools, and coordinated and supervised data collection.

Paolo Vian carried out the statistical analyses, and approved the final manuscript as submitted.

Alessandra Andreotti carried out the statistical analyses, and approved the final manuscript as submitted.

Giulia Grotto drafted the manuscript and approved the final manuscript as submitted.

Vincenzo Baldo critically reviewed and revised the manuscript.

Roberta Pacifici supervised the study, obtained funding, and approved the final manuscript as submitted.

### Acknowledgements

Not applicable.

## ABSTRACT

### Objectives:

The aim of this study was to elucidate the pathway of associations linking gambling, alcohol intake, smoking habit, cannabis consumption between each other and with demographic and socioeconomic variables.

### Setting and participants:

A survey was conducted in 2017 on a representative sample of 15,602 Italian 14- to 17-year-olds attending 201 secondary schools.

### Outcome measures:

Structural Equation Models analysis was used to assess the pathway between gambling, alcohol intake, smoking, cannabis consumption, demographics and socioeconomic factors.

### Results:

Irrespective of socioeconomic or demographic variables, gambling is positively associated with alcohol and cannabis consumption, while cannabis consumption is predicted by smoking and by alcohol intake, smoking is predicted by alcohol intake. Adolescents with a higher weekly income are more at risk of gambling, drinking alcohol and smoking, while the degree of economic dissatisfaction was positively associated with alcohol intake, cannabis consumption and smoking. Maternal employment appeared to be positively associated with adolescents' smoking, alcohol intake and cannabis consumption.

### Conclusions:

This is one of the first studies to shed light on the pathways of associations connecting various health-risk behaviors among adolescents with demographic and socioeconomic factors.

## ARTICLE SUMMARY

### Strengths and limitations of this study

- Data were obtained from a sample of adolescents attending school so the study sample is only representative of Italian school students. This means that adolescents who dropped out of school at 16 years old (on completing their compulsory education in Italy) were not considered.
- Self-reports data were collected which could be biased by under-reporting of respondents about their risk-taking behavior; to mitigate this potential bias, we guaranteed respondents' anonymity and confidentiality.
- Path analysis enables the simultaneous estimation of several associated regression showing interrelation through which independent variables produce both direct and indirect effects on more than one dependent variable; both the magnitude and the significance of associations between variables were estimated.



## INTRODUCTION

In the last decade, problem gambling, alcohol consumption and substance abuse among adolescents has emerged as a growing public health issue[1,2]. Further, gambling disorder has been reclassified as an addiction and related disorder alongside alcohol and other substance use disorders[3].

Adolescence is a developmental stage in which addictions can develop when the experimental use of alcohol, tobacco and drug turns into patterns of regular substance use[4,5]. Previous studies found that pathological gambling was often associated with alcohol, nicotine and substance dependence, suggesting that each of these types of behavior may serve as a primer for the others[6-9]. Other investigations suggested that acute alcohol ingestion may increase the propensity to gamble soon afterwards[10].

Just as various types of substance abuse act as a gateway to others, the literature has demonstrated that different substance abuse risk factors seem to overlap in their association with adolescents' health-risk behaviors. Specific to adolescent development, for example, is the correlation between parents' low socioeconomic status (SES) and the risk of problem behavior in their adolescent offspring[11], whereas higher household incomes seem to be protective, possibly due to their linkage with positive parenting styles and advantaged life circumstances[12]. Problem gambling also seems to be more common in the low SES population[13].

Several studies have investigated the association between substance abuse or gambling risk factors - including socioeconomic characteristics such as male gender, young age, neighborhood disadvantage, and low SES[14-16] - and specific types of health-risk behavior, such as alcohol drinking, cigarette smoking, and illicit substance use[15,17,18]. To our knowledge, however, no prior research has sought at the same time to examine the potential explanatory pathway between the former major risk factors and the latter health-risk behaviors. Hence, our interest in investigating how the relationships between SES and health-risk behaviors drive towards the development of gambling behavior in adolescence.

1  
2  
3 In an attempt to shed light on these associations between SES, substance abuse and gambling behavior,  
4  
5 we simultaneously considered the multiple potential pathways between gambling, alcohol intake,  
6  
7 smoking habit, cannabis consumption, and socioeconomic variables, drawing on data from a large  
8  
9 representative population of Italian high-school students.  
10  
11  
12  
13  
14  
15  
16  
17  
18  
19  
20  
21  
22  
23  
24  
25  
26  
27  
28  
29  
30  
31  
32  
33  
34  
35  
36  
37  
38  
39  
40  
41  
42  
43  
44  
45  
46  
47  
48  
49  
50  
51  
52  
53  
54  
55  
56  
57  
58  
59  
60

## METHODS

The sample population was drawn from the "Gambling in Italy" project, a student population survey conducted in 2017 by the *Istituto Superiore di Sanità*. For the purposes of the present study, the survey is briefly described below.

### Study sample

The sample refers to the Italian student population between 14 and 17 years of age, taking into account the population's geographical distribution nationwide in order to intercept metropolitan, urban and suburban areas. The sampling method followed a three-stage PPS (Probability Proportional to Size) model, where the first-stage units were represented by the cities, the second-stage units by the schools, and the third-stage units by the classes. The sampling design involved stratifying the first-, second- and third-stage units as follows. In each stratum: the first-stage units (cities) were selected with probabilities proportional to the number of upper secondary school classes within the territory of the cities; the second-stage units (schools) were selected with probabilities proportional to the number of classes in the sample schools; and the third-stage units (classes) were selected in the same numbers for each school in the stratum to which they belonged. All students attending the sample classes were included in the sample. Using this sampling method meant that the probability of each class and each student in the target population being selected remained constant.

The survey was conducted using a Computer-Assisted Self Interview (CASI) method that enabled the questionnaire to be completed by students online using a non-replicable, unique, and anonymous access ID. Students accessed the questionnaire using a link provided by the technicians in the schools' computer rooms.

A total of 201 schools (187 public, 14 private) took part in the survey, and 859 classes were sampled, accounting for a student population of 18,042. A total of 17,610 online questionnaires were completed

1  
2  
3 at school by the students who agreed to participate in the survey. Six questionnaires were rejected because  
4 they were answered by students not resident in Italy (step 1); 267 were rejected because they were  
5 incomplete (step 2); another 1,504 were rejected because they were answered by students outside the age  
6 group considered in the survey (i.e. under 14 or over 17 years old) (step 3); and 231 were rejected because  
7 they contained answers judged scarcely plausible (unreliable or irrelevant responses were identified by  
8 means of a Rasch analysis; step 4). Thus, a final number of 15,602 questionnaires (88.6% of the total)  
9 were considered eligible for this study.  
10  
11  
12  
13  
14  
15  
16  
17  
18  
19  
20

### 21 **Patient and public involvement, ethical approval and consent to participation**

22 This study was approved by the ethics committee of the Italian National Health Institute. The study  
23 complied with the Declaration of Helsinki and with Italian Law n. 196/2003 on the protection of personal  
24 data. The questionnaires were anonymous, with no chance of individuals being identifiable. Consent to  
25 the students' participation was required first from the school director, then all parents signed to their  
26 consent to the minors' participation in the survey.  
27  
28  
29  
30  
31  
32  
33  
34

35 No patients were involved in this study.  
36  
37  
38  
39

### 40 **Variables**

41 The demographic variables considered were age bracket (14-15y, 16-17y), and sex.  
42  
43

44 The questionnaire examined respondents' SES and social environment by means of questions on: highest  
45 education level attained by parents (both with a university degree, one with a university degree, at least  
46 one with a high-school diploma, both with an elementary or middle-school diploma); maternal  
47 employment (not working, working); paternal employment (not working, working); level of economic  
48 dissatisfaction (very satisfied/satisfied, neither satisfied nor dissatisfied, dissatisfied/very dissatisfied);  
49  
50  
51  
52  
53  
54  
55  
56  
57  
58  
59  
60

1  
2  
3 amount of weekly pocket money (€0, €1-30, €31-100, €100 or more); parental death (both parents alive,  
4  
5 at least one parent deceased).  
6

7 We also categorized the geographical area (Central-Northern Italy / Southern Italy and Islands) and  
8  
9 considered the type of high school attended (vocational technical/professional schools/ scientific/artistic  
10  
11 grammar schools).  
12  
13

14 The SOGS-RA scale[19,20] was used to examine respondents' gambling behavior. This validated tool  
15  
16 contains 12 items and generates scores that range from 0 to 12. It measures several aspects, such as loss  
17  
18 of control over the game, action taken to recover monetary losses, interference with family, school, and  
19  
20 relational life, guilt feelings about money spent, and consequences of gambling. To be defined as  
21  
22 "gamblers", respondents only had to report having been involved in a gambling activity at least once in  
23  
24 the previous year. Then the SOGS-RA scale identifies three types of "gambler": non-problem (SOGS-  
25  
26 RA score = 0–1); at risk (SOGS-RA = 2–3); and problem (SOGS-RA score higher than 4). Students who  
27  
28 reported having no experience of gambling in the previous year were defined as "non-gamblers". For the  
29  
30 purpose of this study, the variable assessing gambling behavior was divided into two categories: non-  
31  
32 gamblers and non-problem gamblers vs at risk and problem gamblers.  
33  
34  
35  
36

37 Respondents were also questioned about their risk-related substance use: smoking (never in the previous  
38  
39 year / at least once in the previous year), cannabis consumption (never in the previous year / at least once  
40  
41 in the previous year) and intake of alcoholic drinks, i.e. beer, wine, cocktails, spirits (never in the previous  
42  
43 month / at least once in the previous month).  
44  
45  
46  
47  
48

## 49 **Statistical analysis**

50  
51 Previous studies found that people who gambled also tended to have problems with substance abuse[21],  
52  
53 and that certain sociodemographic factors were shared with determinants of these health-risk behaviors.  
54  
55

56 No studies currently available in the literature have considered a broader framework, however, to test for  
57  
58  
59  
60

1  
2  
3 the existence of a comprehensive structure of associations. We use a path analysis to test these  
4  
5 associations. Such an approach can be useful in planning multi-component public health care and  
6  
7 prevention programs. Given the large sample size, Bernoulli's simple random sampling method was  
8  
9 adopted. A bivariate analysis was run on each of the above-described variables and gambling status. A  
10  
11 set of Pearson's chi-squared tests was used to highlight any associations between each health-risk  
12  
13 behavior (gambling, alcohol consumption, smoking and cannabis use) and the demographic and  
14  
15 socioeconomic variables (sex, age bracket, weekly income, level of economic dissatisfaction, paternal  
16  
17 education, maternal employment, paternal employment, death of a parent, type of school, and  
18  
19 geographical area).

20  
21  
22  
23 Path analysis via multiple regression was used to test causal models by examining the relationships  
24  
25 between a dependent variable and independent variables. This enabled the simultaneous estimation of  
26  
27 several associated regression relationships. In this analysis, a variable could be a dependent variable in  
28  
29 one relationship and an independent variable in another. This method enables both the magnitude and  
30  
31 the significance of causal connections between variables to be estimated[22], showing causal  
32  
33 mechanisms through which independent variables produce both direct and indirect effects on a dependent  
34  
35 variable.

36  
37  
38  
39 The path analysis model was estimated using Mplus® software, release 5.21[22]. To estimate the path  
40  
41 coefficients, Mplus used OLS and maximum likelihood methods. The statistics used to test the  
42  
43 significance and goodness of fit of the model were: the Root Mean Square Error of Approximation -  
44  
45 RMSEA (lower than 0.08 for a goodness of fit model), the Comparative Fit Index - CFI (higher than 0.90  
46  
47 for a goodness of fit model) and the Tucker Lewis index - TLI (higher than 0.90 for a goodness of fit  
48  
49 model)[23].  
50  
51  
52  
53  
54  
55  
56  
57  
58  
59  
60

## RESULTS

Of the 15,602 questionnaires analyzed, 50.9% were answered by females, and the mean age of respondents was 15.53 years ( $\pm 1.11$  SD). The prevalence of at-risk/problem gamblers was 6.5% (CI 6.1-6.9). As for the other behaviors considered, 45.4% (CI 44.6-46.2) of the students had had at least one alcoholic drink in the previous month, 25.6% (CI 24.9-26.3) had smoked at least once in the previous year, and 18.1% (CI 17.5-18.7) had consumed cannabis at least once in the previous year.

Table 1 shows the study sample's characteristics. Table 2 shows the bivariate associations between the sociodemographic characteristics and the health-risk behaviors. Table 3 shows the bivariate associations between different health-risk behaviors. Figure 1 shows the pathway analysis.

Irrespective of the socioeconomic and demographic variables, gambling was positively associated with alcohol and cannabis consumption, while cannabis consumption was predicted by smoking and alcohol intake, and smoking was predicted by alcohol intake. As regards the demographic factors, the pathway identified shows that males were more at risk of being involved in all the health-risk behaviors considered in this study except for smoking, while females seemed more likely to smoke. As for the socioeconomic factors, adolescents with a higher weekly income were at greater risk of gambling, drinking alcohol and smoking, while the degree of economic dissatisfaction was positively associated with alcohol intake, cannabis consumption and smoking. Maternal employment seemed to be positively associated with adolescents' smoking, alcohol intake and cannabis consumption. Adolescents with better-educated parents were also at higher risk of drinking alcohol and consuming cannabis. Analyzing the geographical distribution of the different health-risk behaviors, it emerged that gambling was more common in Southern than in Central and Northern Italy, whereas cannabis consumption was more common among adolescents in the center and north of the country. When the prevalence of health-risk behavior was examined by type of school, it emerged that the vocational technical/professional school students were

1  
2  
3 more at risk of gambling, smoking and consuming alcohol, whereas cannabis consumption was higher at  
4  
5 scientific/artistic grammar schools. Lastly, respondents who reported having a deceased parent were  
6  
7 more likely to be smokers.  
8  
9  
10  
11  
12  
13  
14  
15  
16  
17  
18  
19  
20  
21  
22  
23  
24  
25  
26  
27  
28  
29  
30  
31  
32  
33  
34  
35  
36  
37  
38  
39  
40  
41  
42  
43  
44  
45  
46  
47  
48  
49  
50  
51  
52  
53  
54  
55  
56  
57  
58  
59  
60

For peer review only



**Table 1:** Characteristics of the study sample

| Variables                         | Categories                                         | n (%)         |
|-----------------------------------|----------------------------------------------------|---------------|
| Gender                            | Females                                            | 7940 (50.9%)  |
|                                   | Males                                              | 7662 (49.1%)  |
| Age bracket                       | 14-15 y                                            | 7622 (48.9%)  |
|                                   | 16-17 y                                            | 7980 (51.1%)  |
| Gambling                          | Non-gambler + non-problem gamblers                 | 14590 (93.5%) |
|                                   | At risk + problem gamblers                         | 1012 (6.5%)   |
| Alcohol intake                    | Never in the last year                             | 8522 (54.6%)  |
|                                   | At least once last year                            | 7080 (45.4%)  |
| Smoking                           | Never in the last year                             | 11613 (74.4%) |
|                                   | At least once last year                            | 3989 (25.6%)  |
| Cannabis consumption              | Never in the last year                             | 12780 (81.9%) |
|                                   | At least once last year                            | 2822 (18.1%)  |
| Parents' education                | Both with high-school diploma or university degree | 7615 (51.7%)  |
|                                   | At least one with university degree                | 712 (4.8%)    |
|                                   | At least one with high-school diploma              | 3477 (23.6%)  |
| Mother's employment               | Both with elementary or middle-school diploma      | 2930 (19.9%)  |
|                                   | Not working                                        | 4670 (30.4%)  |
| Father's employment               | Working                                            | 10717 (69.6%) |
|                                   | Not working                                        | 1119 (7.4%)   |
| Deceased parents                  | Working                                            | 13987 (92.6%) |
|                                   | Both parents alive                                 | 15311 (98.1%) |
|                                   | At least one deceased parent                       | 291 (1.9%)    |
| Level of economic dissatisfaction | Very satisfied or satisfied                        | 10319 (66.1%) |
|                                   | Neither satisfied nor dissatisfied                 | 4508 (28.9%)  |
|                                   | Dissatisfied or very dissatisfied                  | 775 (5%)      |
| Weekly income (€)                 | 0                                                  | 2882 (18.5%)  |
|                                   | 1-30                                               | 10798 (69.2%) |
|                                   | 31-100                                             | 1599 (10.2%)  |
|                                   | 100 or more                                        | 323 (2.1%)    |
| Geographical area                 | Northern Italy                                     | 6543 (41.9%)  |
|                                   | Central Italy                                      | 2923 (18.7%)  |
|                                   | Southern Italy and Islands                         | 6136 (39.3%)  |
| Type of school                    | Grammar school or artistic high school             | 8071 (51.7%)  |
|                                   | Technical or vocational school                     | 7531 (48.3%)  |

**Table 2:** Bivariate association between socioeconomic and demographic characteristics and health-risk behaviors.

|                                   |                                                      | GAMBLING                            |                            |          | ALCOHOL INTAKE         |                                |          | SMOKING                |                                |          | CANNABIS CONSUMPTION   |                                |          |
|-----------------------------------|------------------------------------------------------|-------------------------------------|----------------------------|----------|------------------------|--------------------------------|----------|------------------------|--------------------------------|----------|------------------------|--------------------------------|----------|
|                                   |                                                      | Non-gamblers + non-problem gamblers | At risk + problem gamblers | <i>p</i> | Never in previous year | At least once in previous year | <i>p</i> | Never in previous year | At least once in previous year | <i>p</i> | Never in previous year | At least once in previous year | <i>p</i> |
|                                   |                                                      | % (n)                               | % (n)                      |          | % (n)                  | % (n)                          |          | % (n)                  | % (n)                          |          | % (n)                  | % (n)                          |          |
| Gen der                           | Females                                              | 98.3 (7807)                         | 1.7 (133)                  | <0.001   | 60.2 (4777)            | 39.8 (3163)                    | <0.001   | 72.0 (5713)            | 28.0 (2227)                    | <0.001   | 85.0 (6752)            | 15.0 (1188)                    | <0.001   |
|                                   | Males                                                | 88.5 (6783)                         | 11.5 (879)                 |          | 48.9 (3745)            | 51.1 (3917)                    |          | 77.0 (5900)            | 23.0 (1762)                    |          | 78.7 (6028)            | 21.3 (1634)                    |          |
| Age bracket                       | 14-15y                                               | 95.1 (7252)                         | 4.9 (370)                  | <0.001   | 66.9 (5097)            | 33.1 (2525)                    | <0.001   | 82.8 (6314)            | 17.2 (1308)                    | <0.001   | 89.2 (6802)            | 10.8 (820)                     | <0.001   |
|                                   | 16-17y                                               | 92.0 (7338)                         | 8.0 (642)                  |          | 42.9 (3425)            | 57.1 (4555)                    |          | 66.4 (5299)            | 33.6 (2681)                    |          | 74.9 (5978)            | 25.1 (2002)                    |          |
| Weekly income (€)                 | 0                                                    | 97.0 (2795)                         | 3.0 (87)                   | <0.001   | 71.3 (2054)            | 28.7 (828)                     | <0.001   | 87.4 (2520)            | 12.6 (362)                     | <0.001   | 90.5 (2608)            | 9.5 (274)                      | <0.001   |
|                                   | 1-30                                                 | 93.9 (10142)                        | 6.1 (656)                  |          | 53.3 (5752)            | 46.7 (5046)                    |          | 73.7 (7953)            | 26.3 (2845)                    |          | 81.7 (8819)            | 18.3 (1979)                    |          |
|                                   | 31-100                                               | 87.9 (1406)                         | 12.1 (193)                 |          | 37.5 (600)             | 62.5 (999)                     |          | 59.2 (946)             | 40.8 (653)                     |          | 70.9 (1134)            | 29.1 (465)                     |          |
|                                   | 100 or more                                          | 76.5 (247)                          | 23.5 (76)                  |          | 35.9 (116)             | 64.1 (207)                     |          | 60.1 (194)             | 39.9 (129)                     |          | 67.8 (219)             | 32.2 (104)                     |          |
| Level of economic dissatisfaction | Very satisfied or satisfied                          | 93.5 (9652)                         | 6.5 (667)                  | 0.003    | 55.8 (5758)            | 44.2 (4561)                    | <0.001   | 76.9 (7933)            | 23.1 (2386)                    | <0.001   | 84.2 (8691)            | 15.8 (1628)                    | <0.001   |
|                                   | Neither satisfied nor dissatisfied                   | 93.9 (4235)                         | 6.1 (273)                  |          | 53.4 (2406)            | 46.6 (2102)                    |          | 70.9 (3194)            | 29.1 (1314)                    |          | 78.5 (3537)            | 21.5 (971)                     |          |
|                                   | Dissatisfied or very dissatisfied                    | 90.7 (703)                          | 9.3 (72)                   |          | 46.2 (358)             | 53.8 (417)                     |          | 62.7 (486)             | 37.3 (289)                     |          | 71.2 (552)             | 28.8 (223)                     |          |
|                                   | Both have a high-school diploma or university degree | 93.9 (7147)                         | 6.1 (468)                  | 0.001    | 53.4 (4069)            | 46.6 (3546)                    | 0.063    | 75.3 (5737)            | 24.7 (1878)                    | 0.001    | 81.4 (6202)            | 18.6 (1413)                    | 0.067    |
| Parents' education                | At least one has a university degree                 | 92.8 (661)                          | 7.2 (51)                   |          | 56.0 (399)             | 44.0 (313)                     |          | 74.2 (528)             | 25.8 (184)                     |          | 80.9 (576)             | 19.1 (136)                     |          |
|                                   | At least one has a high-school diploma               | 93.8 (3260)                         | 6.2 (217)                  |          | 52.5 (1824)            | 47.5 (1653)                    |          | 72.4 (2519)            | 27.6 (958)                     |          | 80.5 (2800)            | 19.5 (677)                     |          |

|                        |                                                        | GAMBLING                                      |                                  |          | ALCOHOL INTAKE               |                                         |          | SMOKING                   |                                         |          | CANNABIS CONSUMPTION         |                                         |          |
|------------------------|--------------------------------------------------------|-----------------------------------------------|----------------------------------|----------|------------------------------|-----------------------------------------|----------|---------------------------|-----------------------------------------|----------|------------------------------|-----------------------------------------|----------|
|                        |                                                        | Non-gamblers<br>+ non-<br>problem<br>gamblers | At risk +<br>problem<br>gamblers | <i>p</i> | Never in<br>previous<br>year | At least<br>once in<br>previous<br>year | <i>p</i> | Never in<br>previous year | At least<br>once in<br>previous<br>year | <i>p</i> | Never in<br>previous<br>year | At least<br>once in<br>previous<br>year | <i>p</i> |
|                        |                                                        | % (n)                                         | % (n)                            |          | % (n)                        | % (n)                                   |          | % (n)                     | % (n)                                   |          | % (n)                        | % (n)                                   |          |
| Mother's<br>employment | Both have<br>elementary or<br>middle school<br>diploma | 91.7 (2688)                                   | 8.3 (242)                        |          | 55.4 (1623)                  | 44.6 (1307)                             |          | 72.3 (2119)               | 27.7 (811)                              |          | 83.1 (2434)                  | 16.9 (496)                              |          |
|                        | Not working                                            | 93.0 (4344)                                   | 7.0 (326)                        | 0.095    | 58.4 (2728)                  | 41.6 (1942)                             | <0.001   | 77.6 (3623)               | 22.4 (1047)                             | <0.001   | 85.5 (3995)                  | 14.5 (675)                              | <0.001   |
|                        | Working                                                | 93.7 (10046)                                  | 6.3 (671)                        |          | 52.9 (5664)                  | 47.1 (5053)                             |          | 73.0 (7822)               | 27.0 (2895)                             |          | 80.4 (8612)                  | 19.6 (2105)                             |          |
| Father's<br>employment | Not working                                            | 92.0 (1030)                                   | 8.0 (89)                         | 0.042    | 56.9 (637)                   | 43.1 (482)                              | 0.081    | 73.1 (818)                | 26.9 (301)                              | 0.221    | 80.6 (902)                   | 19.4 (217)                              | 0.188    |
|                        | Working                                                | 93.6 (13093)                                  | 6.4 (894)                        |          | 54.2 (7585)                  | 45.8 (6402)                             |          | 74.8 (10456)              | 25.2 (3531)                             |          | 82.2<br>(11494)              | 17.8 (2493)                             |          |
| Deceased<br>parents    | Both parents<br>alive                                  | 93.6 (14325)                                  | 6.4 (986)                        | 0.087    | 54.6 (8364)                  | 45.4 (6947)                             | 0.910    | 74.6 (11419)              | 25.4 (3892)                             | 0.002    | 82.0<br>(12558)              | 18.0 (2753)                             | 0.012    |
|                        | At least one<br>deceased<br>parent                     | 91.1 (265)                                    | 8.9 (26)                         |          | 54.3 (158)                   | 45.7 (133)                              |          | 66.7 (194)                | 33.3 (97)                               |          | 76.3 (222)                   | 23.7 (69)                               |          |
| Geographical<br>area   | Northern Italy                                         | 95.6 (6253)                                   | 4.4 (290)                        | <0.001   | 54.8 (3585)                  | 45.2 (2958)                             | 0.268    | 75.8 (4960)               | 24.2 (1583)                             | <0.001   | 81.7 (5343)                  | 18.3 (1200)                             | <0.001   |
|                        | Central Italy                                          | 92.7 (2709)                                   | 7.3 (214)                        |          | 55.7 (1628)                  | 44.3 (1295)                             |          | 71.9 (2102)               | 28.1 (821)                              |          | 79.1 (2312)                  | 20.9 (611)                              |          |
|                        | Southern Italy<br>and Isles                            | 91.7 (5628)                                   | 8.3 (508)                        |          | 53.9 (3309)                  | 46.1 (2827)                             |          | 74.2 (4551)               | 25.8 (1585)                             |          | 83.5 (5125)                  | 16.5 (1011)                             |          |
| Type of<br>school      | Grammar or<br>artistic high<br>school                  | 95.7 (7725)                                   | 4.3 (346)                        | <0.001   | 58.0 (4682)                  | 42.0 (3389)                             | <0.001   | 77.0 (6215)               | 23.0 (1856)                             | <0.001   | 83.5 (6741)                  | 16.5 (1330)                             | <0.001   |
|                        | Technical or<br>vocational<br>school                   | 91.2 (6865)                                   | 8.8 (666)                        |          | 51.0 (3840)                  | 49.0 (3691)                             |          | 71.7 (5398)               | 28.3 (2133)                             |          | 80.2 (6039)                  | 19.8 (1492)                             |          |

**Table 3:** Bivariate associations between different health-risk behaviors.

|                      |                                    | ALCOHOL INTAKE             |                                    |          | SMOKING                    |                                    |          | CANNABIS CONSUMPTION       |                                    |          | GAMBLING                            |                            |          |
|----------------------|------------------------------------|----------------------------|------------------------------------|----------|----------------------------|------------------------------------|----------|----------------------------|------------------------------------|----------|-------------------------------------|----------------------------|----------|
|                      |                                    | Never in the previous year | At least once in the previous year | <i>p</i> | Never in the previous year | At least once in the previous year | <i>p</i> | Never in the previous year | At least once in the previous year | <i>p</i> | Non-gamblers + non-problem gamblers | At risk + problem gamblers | <i>p</i> |
|                      |                                    | % (n)                      | % (n)                              |          | % (n)                      | % (n)                              |          | % (n)                      | % (n)                              |          | % (n)                               | % (n)                      |          |
| ALCOHOL INTAKE       | Never in the previous year         |                            |                                    |          | 88.8 (7571)                | 11.2 (951)                         | <0.001   | 93.3 (7949)                | 6.7 (573)                          | <0.001   | 97.2 (8283)                         | 2.8 (239)                  | <0.001   |
|                      | At least once in the previous year |                            |                                    |          | 57.1 (4042)                | 42.9 (3038)                        |          | 68.2 (4831)                | 31.8 (2249)                        |          | 89.1 (6307)                         | 10.9 (773)                 |          |
| SMOKING              | Never in the previous year         |                            |                                    |          |                            |                                    |          | 93.7 (10886)               | 6.3 (727)                          | <0.001   | 95.1 (11049)                        | 4.9 (564)                  | <0.001   |
|                      | At least once in the previous year |                            |                                    |          |                            |                                    |          | 47.5 (1894)                | 52.5 (2095)                        |          | 88.8 (3541)                         | 11.2 (448)                 |          |
| CANNABIS CONSUMPTION | Never in the previous year         |                            |                                    |          |                            |                                    |          |                            |                                    |          | 95.3 (12174)                        | 4.7 (606)                  | <0.001   |
|                      | At least once in the previous year |                            |                                    |          |                            |                                    |          |                            |                                    |          | 85.6 (2416)                         | 14.4 (406)                 |          |

## DISCUSSION

The present study illustrates the pathway linking health-risk behaviors with demographic and socioeconomic factors. The findings indicate that nearly one in two underage school students had had at least one alcoholic drink in the previous month, that one in four smoked, nearly one in five had consumed cannabis in the previous year, and one in fifteen could be defined as an at risk or problem gambler. These prevalence data are consistent with previous research[24]. The particular geographical distribution of the odds ratios for the prevalence of different health-risk behaviors in Italy was also in line with official records[25,26].

On the associations between different types of health-risk behavior, this study highlighted that gambling is associated with alcohol and cannabis consumption, even after controlling for socioeconomic and demographic factors. The higher prevalence of multiple health-risk behaviors among young gamblers is a commonly recognized problem[27]. For instance, data from a U.S. sample of 2,274 young people aged 14 to 21 years showed that alcohol, tobacco and marijuana use, and conduct disorder are strong independent predictors of gambling[27]. **Error! Bookmark not defined.** This supports the concept that substance abuse and gambling behavior are part of a more general problem behavior syndrome associated with conduct disorder[27]. This concept suggests that, as one type of adolescent problem behavior increases, the likelihood of other problem behaviors developing increases too, and the co-occurrence of problem behaviors suggests that they have antecedent explanatory factors in common[27]. The tendency of some adolescents to adopt multiple health-risk behaviors could be explained by the “gateway hypothesis”[28,29], according to which an adolescent’s early experimentation with alcohol or tobacco or cannabis can escalate to more addictive illicit drug use[30].

1  
2  
3 As regards the economic factors, a higher weekly income was positively associated with all the health-  
4 risk behaviors considered in this study, with the exception of cannabis consumption. Consistently with  
5 this finding, a New Zealand survey on a sample of secondary school students of the same age as our  
6 sample (14-17 years old) revealed that the proportion of students with part-time jobs, and consequently  
7 more money, was associated with a greater consumption of alcohol, cigarettes and gambling[31]. These  
8 results suggest that having access to more money could increase an adolescent's chances of engaging in  
9 health-risk behaviors[31]. In fact, previous research found that demand for substances is price-  
10 sensitive[32,33]: following the demand model for goods and services, adolescents with higher disposable  
11 incomes could also be at higher risk of substance use because they have more financial resources to  
12 purchase alcohol[34], or other addictive substances[35,36]. It would be worth considering intervention  
13 designed to provide young people with guidance on the use of their discretionary income[31], alongside  
14 approaches that steer parents to limit the amount of money they give to their children unless they have a  
15 clear picture of how it is being spent.  
16  
17  
18  
19  
20  
21  
22  
23  
24  
25  
26  
27  
28  
29  
30  
31  
32

33 Our study also revealed that economic dissatisfaction was associated with alcohol, smoking and cannabis  
34 use, but not with gambling behavior. In line with our results, a meta-analysis[37] on marijuana and  
35 alcohol use by SES in adolescents aged 10-15 years found that the prevalence of marijuana and alcohol  
36 consumption was 22% higher in adolescents with a lower SES than in those with a higher SES. A possible  
37 explanation for this could come from strain theory[38], according to which coming from a relatively poor  
38 family (like failing at school) can be as a source of dissatisfaction that promotes potential health-risk  
39 behavior, including substance use, as a way to gain respect when ordinary social valuations are  
40 impossible[39]. In the light of these findings, it would be desirable for public health prevention strategies  
41 to focus most on the more deprived populations in order to prevent the spread of social inequalities,  
42 which might even be further aggravated by untargeted prevention schemes.  
43  
44  
45  
46  
47  
48  
49  
50  
51  
52  
53  
54  
55  
56  
57  
58  
59  
60

1  
2  
3 As for the social context, this study found maternal employment positively associated with alcohol and  
4 cannabis consumption, and smoking in adolescence. A possible explanation for this could lie in that  
5 working mothers generally spend less time at home, and might monitor their children less effectively.  
6  
7 Previous studies have shown an increased risk of tobacco and alcohol use among adolescents who  
8 experience less parental supervision due to their absence from home[40]. In fact, parental monitoring,  
9  
10 which incorporates parent-youth communication, and youth supervision by parents or guardians, seems  
11 to be especially influential in its association with adolescent involvement in health-risk behaviors, both  
12 delaying the onset of such behaviors among naive adolescents, and containing them among adolescents  
13 already practicing them[41,42].  
14  
15  
16  
17  
18  
19  
20  
21  
22  
23  
24  
25

26 Our study highlighted a major risk of smoking in adolescents who had experienced a parent's death.  
27  
28 Other authors[43] examined the impact of exposure to family adversity (including parental death,  
29 parental conflict, parental absence from home, and divorce) on the timing of smoking initiation, using  
30 data from a longitudinal panel study. The four types of family adversity examined were all associated  
31 with a higher risk of smoking, but losing a parent had the greatest impact on the initiation of smoking.  
32  
33 There is substantial evidence of these adverse experiences having a deleterious impact on a child's  
34 developmental, behavioral, psychosocial, and physical outcomes[44]. Adolescents, in particular, may try  
35 substance use in an effort to cope with their stress, as posited by stress-coping theory[45]. In parallel,  
36 social learning theory suggests that people who face more adversity tend to have parents or close friends  
37 who are themselves substance users[46,47], and are consequently at higher risk of substance use  
38 themselves.  
39  
40  
41  
42  
43  
44  
45  
46  
47  
48  
49  
50  
51  
52

53 The findings of this study emphasize the fact that health-risk behaviors are more likely in population  
54 subgroups characterized by certain socioeconomic variables. It would therefore be useful to design  
55  
56  
57  
58  
59  
60

1  
2  
3 selective prevention measures (program designed for at risk groups) as well as the recommended  
4 universal approaches (program designed for overall target population such as students) and indicated  
5 ones (programs designed for people who are already experimenting with drugs)[48]. A good example of  
6 a successfully-implemented prevention scheme is the Adolescent Transitions Program (ATP)[49]: this is  
7 a school-based program that uses a tiered approach to provide prevention services for students in middle  
8 school and junior high school, and their parents. A general intervention, intended for parents of all  
9 students in a school, establishes a Family Resource Room to engage parents, establish norms for  
10 parenting practices, and disseminate information about the risks of problem behavior and substance use  
11 in adolescence. A selective intervention level, called the Family Check-Up, offers family assessments  
12 and professional support to identify families at risk of problem behavior and substance use. The indicated  
13 level, the Parent Focus curriculum, provides direct professional support to help parents make the changes  
14 indicated by the Family Check-Up. The services may include behavioral family therapy, parenting  
15 groups, or case management services[48]. The longitudinal effects of the ATP through middle school  
16 and the first year of high school have been analyzed and shown that random assignments to the school-  
17 based ATP were associated with a lower incidence of substance use by the first year of high school, even  
18 after controlling for prior substance use in middle school[49].  
19  
20  
21  
22  
23  
24  
25  
26  
27  
28  
29  
30  
31  
32  
33  
34  
35  
36  
37  
38  
39  
40  
41

## 42 **Limitations**

43  
44 This study has a couple of limitations, primarily relating to the fact that our data were obtained from a  
45 sample of adolescents attending school. This means that those who dropped out of school at 16 years old  
46 (on completing their compulsory education in Italy) were not considered, so our sample was only  
47 representative of Italian school students. A second limitation lies in that our findings are based on self-  
48 reports and may be biased by respondents' under- or over-reporting of their risk-taking behavior. To  
49 mitigate this potential bias, we guaranteed respondents' anonymity and confidentiality.  
50  
51  
52  
53  
54  
55  
56  
57  
58  
59  
60



## Conclusions

This is one of the first studies to analyze the explanatory pathway connecting health-risk behaviors (such as gambling, alcohol drinking, smoking and cannabis consumption) with demographic and socioeconomic factors in adolescence. Clarifying the various determinants of the worrying phenomena of substance use and gambling in this age group is fundamental to the design of appropriate public health strategies and prevention measures in order to address and contain these widespread issues.

## Figure legend

Figure 1: Pathway analysis of associations between gambling, substance use, and demographic and socioeconomic factors.

## REFERENCES

- 1 Molinaro S, Canale N, Vieno A, et al. Country- and individual level determinants of probable problematic gambling in adolescence: A multi-level cross-national comparison. *Addiction* 2014;109(12):2089–97. <http://dx.doi.org/10.1111/add.12719>.
- 2 Gutierrez A, Sher L. Alcohol and drug use among adolescents: an educational overview. *Int J Adolesc Med Health* 2015;27(2):207-12. doi: 10.1515/ijamh-2015-5013.
- 3 American Psychiatric Association. Diagnostic and Statistical Manual of Mental Disorders. 5th edn. Arlington, VA: American Psychiatric Publishing 2013.
- 4 Jackson KM, Sher KJ, Schulenberg JE. Conjoint developmental trajectories of young adult alcohol and tobacco use. *J Abnorm Psychol* 2005;114(4):612-26.
- 5 Chambers RA, Potenza MN. Neurodevelopment, impulsivity, and adolescent gambling. *J Gambl Stud* 2003;19(1):53-84.
- 6 McGrath DS, Barrett SP. The comorbidity of tobacco smoking and gambling: A review of the literature. *Drug Alcohol Rev* 2009;28(6):676-81. doi: 10.1111/j.1465-3362.2009.00097.x.
- 7 Tackett JL, Krieger H, Neighbors C, et al. Comorbidity of alcohol and gambling problems in emerging adults: A bifactor model conceptualization. *J Gambl Stud* 2017;33(1):131-47. doi: 10.1007/s10899-016-9618-6.
- 8 Cunningham-Williams RM, Cottler LB, Compton WM, et al. Taking chances: Problem gamblers and mental health disorders - Results from the St. Louis Epidemiologic Catchment Area Study. *Am J Public Health* 1998;88(7):1093-6.
- 9 Crockford DN, el-Guebaly N. Psychiatric comorbidity in pathological gambling: A critical review. *Can J Psychiatry* 1998;43(1):43-50.
- 10 Crounce JM, Corbin WR. Effects of alcohol and initial gambling outcomes on within-session gambling behavior. *Exp Clin Psychopharmacol* 2010;18(2):145-57. doi: 10.1037/a0019114.

- 1  
2  
3 11 Soteriades ES, DiFranza JR. Parent's socioeconomic status, adolescents' disposable income, and  
4 adolescents' smoking status in Massachusetts. *Am J Public Health* 2003;93(7):1155-60.  
5  
6  
7 12 Wen M, Van Duker H, Olson LM. Social contexts of regular smoking in adolescence: Towards a  
8 multidimensional ecological model. *J Adolesc* 2009;32(3):671-92. doi:  
9 10.1016/j.adolescence.2008.06.008.  
10  
11  
12 13 Welte JW, Barnes GM, Tidwell MC, et al. The prevalence of problem gambling among U.S.  
13 adolescents and young adults: Results from a national survey. *J Gambl Stud* 2007;24(2):119-33.  
14  
15 14 Kristiansen SG, Jensen SM. Prevalence and correlates of problematic gambling among Danish  
16 adolescents. *Int J Soc Welfare* 2014;23:89-99.  
17  
18 15 Blinn-Pike L, Worthy SL, Jonkman JN. Adolescent gambling: A review of an emerging field of  
19 research. *J Adolesc Health* 2010;47(3):223-36. doi: 10.1016/j.jadohealth.2010.05.003.  
20  
21 16 Martins SS, Storr CL, Lee GP, Ialongo NS. Environmental influences associated with gambling in  
22 young adulthood. *J Urban Health* 2013;90(1):130-40.  
23  
24 17 Buja A, Lion C, Scioni M, et al. SOGS-RA gambling scores and substance use in adolescents. *J Behav*  
25 *Addict* 2017;6(3):425-433. doi: 10.1556/2006.6.2017.043.  
26  
27 18 Barnes GM, Welte JW, Hoffman JH, et al. Gambling and alcohol use among youth: Influences of  
28 demographic, socialization, and individual factors. *Addict Behav* 1999;24(6):749-67.  
29  
30 19 Winters KC, Stinchfield RD, Fulkerson J. Toward the development of an adolescent gambling  
31 problem severity scale. *J Gambl Stud* 1993;9(1):63-84.  
32  
33 20 Poulin C. An assessment of the validity and reliability of the SOGS-RA. *J Gambl Stud* 2002;18(1):67-  
34 93.  
35  
36 21 Peters EN<sup>1</sup>, Nordeck C, Zanetti G, O'Grady KE, Serpelloni G, Rimondo C, Blanco C, Welsh C,  
37 Schwartz RP. Relationship of gambling with tobacco, alcohol, and illicit drug use among adolescents in  
38  
39  
40  
41  
42  
43  
44  
45  
46  
47  
48  
49  
50  
51  
52  
53  
54  
55  
56  
57  
58  
59  
60

- 1  
2  
3 the USA: Review of the literature 2000-2014. *Am J Addict*. 2015 Apr;24(3):206-16. doi:  
4  
5 10.1111/ajad.12214. Epub 2015 Apr 12.  
6  
7  
8 22 Muthen LK, Muthen BO. *Mplus User's Guide*. 5th edn. Los Angeles, CA: Muthen & Muthen 1998-  
9  
10 2009.  
11  
12 23 Kline RB. *Principles and practice of structural equation modeling*. 3rd edn. New York, NY: Guilford  
13  
14 Press 2010.  
15  
16  
17 24 Caldeira KM, Arria AM, O'Grady KE, et al. Risk factors for gambling and substance use among recent  
18  
19 college students. *Drug Alcohol Depend* 2017;179:280-90. doi: 10.1016/j.drugalcdep.2017.06.024.  
20  
21  
22 25 [https://www.epid.ifc.cnr.it/images/downloads/Report/Gioco/Consumi\\_azzardo\\_2017.pdf](https://www.epid.ifc.cnr.it/images/downloads/Report/Gioco/Consumi_azzardo_2017.pdf) (accessed  
23  
24 16 Apr 2019).  
25  
26  
27 26 [http://www.politicheantidroga.gov.it/media/2153/relazione-al-parlamento\\_2017.pdf](http://www.politicheantidroga.gov.it/media/2153/relazione-al-parlamento_2017.pdf) (accessed 16  
28  
29 Apr 2019)  
30  
31 27 Barnes GM, Welte JW, Hoffman JH, et al. The co-occurrence of gambling with substance use and  
32  
33 conduct disorder among youth in the US. *Am J Addict* 2011;20:166–173.  
34  
35  
36 28 Kandel D. Stages in adolescent involvement in drug use. *Science* 1975;190(4217):912-4.  
37  
38 29 Kandel DP, Faust R. Sequence and stages in patterns of adolescent drug use. *Arch Gen Psychiatry*  
39  
40 1975;32(7):923-32.  
41  
42  
43 30 Lynskey MT, Heath AC, Bucholz KT. Escalation of drug use in early-onset cannabis users vs co-twin  
44  
45 controls. *JAMA* 2003;289(4):427-33.  
46  
47  
48 31 Darling H, Reeder AI, McGee R, et al. Brief report: Disposable income, and spending on fast food,  
49  
50 alcohol, cigarettes, and gambling by New Zealand secondary school students. *J Adolesc* 2006;29(5):837-  
51  
52 43.  
53  
54 32 Farrell S, Manning WG, Finch M. Alcohol dependence and the price of alcoholic beverages. *J Health*  
55  
56 *Econ* 2003;22(1):117-47.  
57  
58  
59  
60

- 1  
2  
3 33 Keeler T, Hu T, Barnett P, et al. Do cigarette producers price-discriminate by state? An empirical  
4 analysis of local cigarette pricing and taxation. *J Health Econ* 1996;15(4):499-512.  
5  
6  
7 34 Bellis MA, Hughes K, Morleo M, et al. Predictors of risky alcohol consumption in schoolchildren and  
8 their implications for preventing alcohol-related harm. *Subst Abuse Treat Prev Policy* 2007;2:15.  
9  
10 35 Arillo-Santillan E, Lazcano-Ponce E, Hernandez-Avila M, et al. Associations between individual and  
11 contextual factors and smoking in 13,293 Mexican students. *Am J Prev Med* 2005;28(1):41-51.  
12  
13 36 Humensky JL. Are adolescents with high socioeconomic status more likely to engage in alcohol and  
14 illicit drug use in early adulthood? *Subst Abuse Treat Prev Policy* 2010;5:19. doi: 10.1186/1747-597X-  
15 5-19.  
16  
17 37 Lemstra M, Bennett NR, Neudorf C, et al. A meta-analysis of marijuana and alcohol use by socio-  
18 economic status in adolescents aged 10-15 years. *Can J Public Health* 2008;99(3):172-7.  
19  
20 38 Agnew R, White H. An empirical test of general strain theory. *Criminology* 1992;30:475-99  
21  
22 39 Legleye S, Janssen E, Beck F, et al. Social gradient in initiation and transition to daily use of tobacco  
23 and cannabis during adolescence: a retrospective cohort study. *Addiction* 2011;106(8):1520-31. doi:  
24 10.1111/j.1360-0443.2011.03447.x.  
25  
26 40 Lacey RE, Zilanawala A, Webb E, et al. Parental absence in early childhood and onset of smoking  
27 and alcohol consumption before adolescence. *Arch Dis Child* 2018;103(7):691-694. doi:  
28 10.1136/archdischild-2016-310444.  
29  
30 41 Steinberg L, Fletcher A, Darling N. Parental monitoring and peer influences on adolescent substance  
31 use. *Pediatrics* 1994;93(6 Pt 2):1060-4.  
32  
33 42 Li X, Stanton B, Feigelman S. Impact of perceived parental monitoring on adolescent risk behavior  
34 over 4 years. *J Adolesc Health* 2000;27(1):49-56.  
35  
36  
37  
38  
39  
40  
41  
42  
43  
44  
45  
46  
47  
48  
49  
50  
51  
52  
53  
54  
55  
56  
57  
58  
59  
60

1  
2  
3 43 Hsu YT, Kawachi I. Timing of family adversity during adolescence and its impact on alcohol and  
4 tobacco initiation: a longitudinal study among Taiwanese adolescents. *Child Psychiatry Hum Dev*  
5 2019;50(2):257-67. doi: 10.1007/s10578-018-0838-0.  
6  
7

8  
9  
10 44 Shonkoff JP, Garner AS. Committee on Psychosocial Aspects of Child and Family Health; et al. The  
11 lifelong effects of early childhood adversity and toxic stress. *Pediatrics* 2012;129(1):e232-46. doi:  
12 10.1542/peds.2011-2663.  
13  
14

15  
16  
17 45 Sudraba V, Millere A, Deklava L, et al. Stress coping strategies of drug and alcohol addicted patients  
18 in Latvia. *Proc Soc Behav Sci* 2015;205:632-636.  
19

20  
21 46 Anda RF, Whitfield CL, Felitti VJ, et al. Adverse childhood experiences, alcoholic parents, and later  
22 risk of alcoholism and depression. *Psychiatr Serv* 2002;53(8):1001-9.  
23  
24

25  
26 47 Dube SR, Felitti VJ, Dong M, et al. Childhood abuse, neglect, and household dysfunction and the risk  
27 of illicit drug use: the Adverse Childhood Experiences study. *Pediatrics* 2003;111(3):564-72.  
28  
29

30  
31 48 Robertson EB, David SL, Rao SA. Preventing drug use among children and adolescents. A research-  
32 based guide for parents, educators, and community leaders. 2nd edn. Bethesda, MD: US Department of  
33 Health and Human Services, National Institute on Drug Abuse 2003 NIH Publication no 04-4212(A).  
34  
35

36  
37 49 Dishion TJ, Kavanagh K, Schneiger A, et al. Preventing early adolescent substance use: A family-  
38 centered strategy for the public middle school. *Prev Sci* 2002;3(3):191-201.  
39  
40  
41  
42  
43  
44  
45  
46  
47  
48  
49  
50  
51  
52  
53  
54  
55  
56  
57  
58  
59  
60

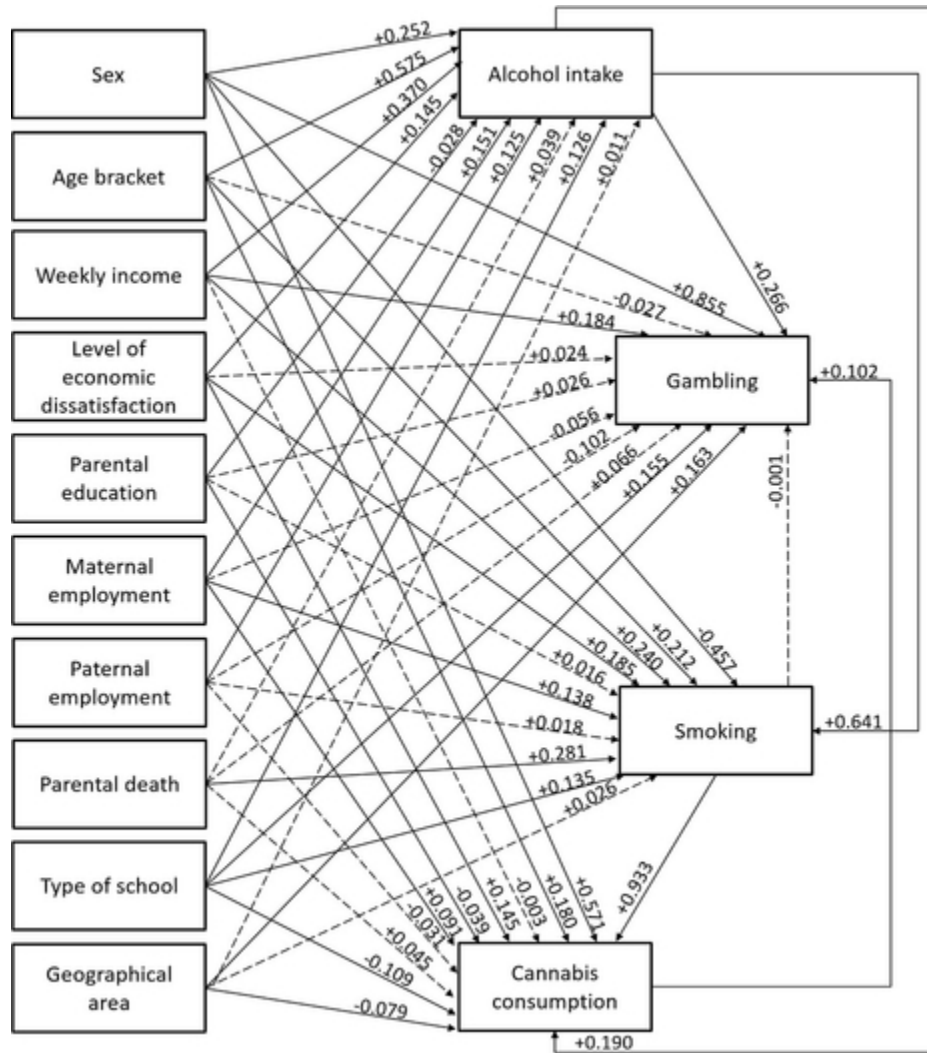

Figure 1: Pathway analysis of associations between gambling, substance use, and demographic and socioeconomic factors.

19x22mm (600 x 600 DPI)

**STROBE 2007 (v4) Statement—Checklist of items that should be included in reports of *cross-sectional studies***

| Section/Topic                | Item # | Recommendation                                                                                                                                                                       | Reported on page # |
|------------------------------|--------|--------------------------------------------------------------------------------------------------------------------------------------------------------------------------------------|--------------------|
| <b>Title and abstract</b>    | 1      | (a) Indicate the study's design with a commonly used term in the title or the abstract                                                                                               | 1                  |
|                              |        | (b) Provide in the abstract an informative and balanced summary of what was done and what was found                                                                                  | 5                  |
| <b>Introduction</b>          |        |                                                                                                                                                                                      |                    |
| Background/rationale         | 2      | Explain the scientific background and rationale for the investigation being reported                                                                                                 | 7                  |
| Objectives                   | 3      | State specific objectives, including any prespecified hypotheses                                                                                                                     | 8                  |
| <b>Methods</b>               |        |                                                                                                                                                                                      |                    |
| Study design                 | 4      | Present key elements of study design early in the paper                                                                                                                              | 9, 10, 11          |
| Setting                      | 5      | Describe the setting, locations, and relevant dates, including periods of recruitment, exposure, follow-up, and data collection                                                      | 9, 10              |
| Participants                 | 6      | (a) Give the eligibility criteria, and the sources and methods of selection of participants                                                                                          | 9, 10              |
| Variables                    | 7      | Clearly define all outcomes, exposures, predictors, potential confounders, and effect modifiers. Give diagnostic criteria, if applicable                                             | 10, 11             |
| Data sources/<br>measurement | 8*     | For each variable of interest, give sources of data and details of methods of assessment (measurement). Describe comparability of assessment methods if there is more than one group | 10, 11             |
| Bias                         | 9      | Describe any efforts to address potential sources of bias                                                                                                                            | 6, 21              |
| Study size                   | 10     | Explain how the study size was arrived at                                                                                                                                            | 9, 10              |
| Quantitative variables       | 11     | Explain how quantitative variables were handled in the analyses. If applicable, describe which groupings were chosen and why                                                         | 10, 11             |
| Statistical methods          | 12     | (a) Describe all statistical methods, including those used to control for confounding                                                                                                | 11, 12             |
|                              |        | (b) Describe any methods used to examine subgroups and interactions                                                                                                                  | 11, 12             |
|                              |        | (c) Explain how missing data were addressed                                                                                                                                          | /                  |
|                              |        | (d) If applicable, describe analytical methods taking account of sampling strategy                                                                                                   | 11, 12             |
|                              |        | (e) Describe any sensitivity analyses                                                                                                                                                | 11, 12             |
| <b>Results</b>               |        |                                                                                                                                                                                      |                    |



|                          |     |                                                                                                                                                                                                              |                |
|--------------------------|-----|--------------------------------------------------------------------------------------------------------------------------------------------------------------------------------------------------------------|----------------|
| Participants             | 13* | (a) Report numbers of individuals at each stage of study—eg numbers potentially eligible, examined for eligibility, confirmed eligible, included in the study, completing follow-up, and analysed            | 13             |
|                          |     | (b) Give reasons for non-participation at each stage                                                                                                                                                         | /              |
|                          |     | (c) Consider use of a flow diagram                                                                                                                                                                           | /              |
| Descriptive data         | 14* | (a) Give characteristics of study participants (eg demographic, clinical, social) and information on exposures and potential confounders                                                                     | 13, 14         |
|                          |     | (b) Indicate number of participants with missing data for each variable of interest                                                                                                                          | /              |
| Outcome data             | 15* | Report numbers of outcome events or summary measures                                                                                                                                                         | 13             |
| Main results             | 16  | (a) Give unadjusted estimates and, if applicable, confounder-adjusted estimates and their precision (eg, 95% confidence interval). Make clear which confounders were adjusted for and why they were included | 13             |
|                          |     | (b) Report category boundaries when continuous variables were categorized                                                                                                                                    | 13             |
|                          |     | (c) If relevant, consider translating estimates of relative risk into absolute risk for a meaningful time period                                                                                             | /              |
| Other analyses           | 17  | Report other analyses done—eg analyses of subgroups and interactions, and sensitivity analyses                                                                                                               | 11, 12         |
| <b>Discussion</b>        |     |                                                                                                                                                                                                              |                |
| Key results              | 18  | Summarise key results with reference to study objectives                                                                                                                                                     | 18, 19, 20, 21 |
| Limitations              | 19  | Discuss limitations of the study, taking into account sources of potential bias or imprecision. Discuss both direction and magnitude of any potential bias                                                   | 21             |
| Interpretation           | 20  | Give a cautious overall interpretation of results considering objectives, limitations, multiplicity of analyses, results from similar studies, and other relevant evidence                                   | 18, 19, 20, 21 |
| Generalisability         | 21  | Discuss the generalisability (external validity) of the study results                                                                                                                                        | 20, 21, 22     |
| <b>Other information</b> |     |                                                                                                                                                                                                              |                |
| Funding                  | 22  | Give the source of funding and the role of the funders for the present study and, if applicable, for the original study on which the present article is based                                                | 3              |

\*Give information separately for cases and controls in case-control studies and, if applicable, for exposed and unexposed groups in cohort and cross-sectional studies.

**Note:** An Explanation and Elaboration article discusses each checklist item and gives methodological background and published examples of transparent reporting. The STROBE checklist is best used in conjunction with this article (freely available on the Web sites of PLoS Medicine at <http://www.plosmedicine.org/>, Annals of Internal Medicine at <http://www.annals.org/>, and Epidemiology at <http://www.epidem.com/>). Information on the STROBE Initiative is available at [www.strobe-statement.org](http://www.strobe-statement.org).
