# Supplementary material for: Pathways connecting socioeconomic variables, substance abuse and gambling behaviour: a cross-sectional study on a sample of Italian high-school students
Source: PubMed Central journal article supplement — BMJ Open. 2019 Nov 11;9(11):e031737. doi: 10.1136/bmjopen-2019-031737 (PMC6858210; doi:10.1136/bmjopen-2019-031737), 2019-11-11
Supplement: bmjopen-2019-031737.reviewer_comments.pdf [file bmjopen-2019-031737.reviewer_comments.pdf]

## PEER REVIEW HISTORY

BMJ Open publishes all reviews undertaken for accepted manuscripts. Reviewers are asked to complete a checklist review form (<http://bmjopen.bmj.com/site/about/resources/checklist.pdf>) and are provided with free text boxes to elaborate on their assessment. These free text comments are reproduced below.

### ARTICLE DETAILS

|                            |                                                                                                                                                                                                       |
|----------------------------|-------------------------------------------------------------------------------------------------------------------------------------------------------------------------------------------------------|
| <b>TITLE (PROVISIONAL)</b> | Pathways connecting socioeconomic variables, substance abuse and gambling behavior: a cross-sectional study on a sample of Italian high-school students.                                              |
| <b>AUTHORS</b>             | Buja, Alessandra; Mortali, Claudia; Mastrobattista, Luisa; Minutillo, Adele; Pichini, Simona; Genetti, Bruno; Vian, Paolo; Andreotti, Alessandra; Grotto, Giulia ; Baldo, Vincenzo; Pacifici, Roberta |

### VERSION 1 – REVIEW

|                        |                                                                                         |
|------------------------|-----------------------------------------------------------------------------------------|
| <b>REVIEWER</b>        | Adilson Marques<br>Faculdade de Motricidade Humana, Universidade de Lisboa,<br>Portugal |
| <b>REVIEW RETURNED</b> | 25-May-2019                                                                             |

|                         |                                                                                                                                                                                                                                                                                                                                                                                                                                                                                                                                                                                                                                                                                                                                                                                                                                                                                                                                                                                                                                                                                                                                          |
|-------------------------|------------------------------------------------------------------------------------------------------------------------------------------------------------------------------------------------------------------------------------------------------------------------------------------------------------------------------------------------------------------------------------------------------------------------------------------------------------------------------------------------------------------------------------------------------------------------------------------------------------------------------------------------------------------------------------------------------------------------------------------------------------------------------------------------------------------------------------------------------------------------------------------------------------------------------------------------------------------------------------------------------------------------------------------------------------------------------------------------------------------------------------------|
| <b>GENERAL COMMENTS</b> | <p>Journal<br/>BMJ Open</p> <p>Title<br/>Pathways connecting socio-economic status and health-risk behaviors</p> <p>Manuscript ID<br/>bmjopen-2019-031737</p> <p>Comments<br/>Thank you for the opportunity to read this paper. After reading the paper I have some comments and concerns that I will address in the following comments.</p> <p>Abstract<br/>Page 5, lines 10-15. The first sentence of the introduction can be deleted because it does not add anything meaningful to the article.</p> <p>Introduction<br/>Page 7, line 18. The relationship between pathological gambling and comorbidities for alcohol-related disorders should be eliminated. The article does not address this particular issue. By keeping this idea here, we should also explore the comorbidity rates associated with other dependencies.</p> <p>The introduction and the title do not seem to coincide. When reading the introduction the reader does not know that the article is related to gambling risk factors. This should be better explained in the title.</p> <p>Methods<br/>There is no mention of the ethics committee approval.</p> |
|-------------------------|------------------------------------------------------------------------------------------------------------------------------------------------------------------------------------------------------------------------------------------------------------------------------------------------------------------------------------------------------------------------------------------------------------------------------------------------------------------------------------------------------------------------------------------------------------------------------------------------------------------------------------------------------------------------------------------------------------------------------------------------------------------------------------------------------------------------------------------------------------------------------------------------------------------------------------------------------------------------------------------------------------------------------------------------------------------------------------------------------------------------------------------|

|  |                                                                                                                                                                                                                                                                                                                                                                                                                                                                                                                                                                                                                                                                                                                                                                                                                                                                                                                                                                                                                                                                                                                                                                                                                                                                                                                                                                                                    |
|--|----------------------------------------------------------------------------------------------------------------------------------------------------------------------------------------------------------------------------------------------------------------------------------------------------------------------------------------------------------------------------------------------------------------------------------------------------------------------------------------------------------------------------------------------------------------------------------------------------------------------------------------------------------------------------------------------------------------------------------------------------------------------------------------------------------------------------------------------------------------------------------------------------------------------------------------------------------------------------------------------------------------------------------------------------------------------------------------------------------------------------------------------------------------------------------------------------------------------------------------------------------------------------------------------------------------------------------------------------------------------------------------------------|
|  | <p>Page 10, line 40. What was the criterion for grouping the ages in this way?</p> <p>Page 10, lines 40-56. How were the variables (education, employment status, and household income integrated to calculate ESE? This should be explained clearly.</p> <p>Page 11, line 47. The first sentence of the Statistical analysis subsection can be deleted.</p> <p>Page 11, line 52-54. Please specify the “other variables”.</p> <p>Results<br/>If possible, please add a table (table 1) with participants’ characteristics.</p> <p>Table 1 presents the bivariate relationship between SES variables and risk behaviors. However, this relationship is not always real, because the analyzes are not adjusted. Thus, I suggest that the analyzes be done through logistic regression, in which risk behaviors enter as dependent variables, and the SES variables enter as independent variables. A model must be made for each risky behavior. With the logistic regression model, they will have the odds ratio and confidence interval, which is more important than p-value.</p> <p>Reading the results section, I feel that the pathways were not properly explored. There is a figure and seem to be all.</p> <p>Discussion<br/>Page 18, line 19. I could see were the odds ration were presented in the results section.</p> <p>Page 18, line 37. Delete “Error! Bookmark not defined.”</p> |
|--|----------------------------------------------------------------------------------------------------------------------------------------------------------------------------------------------------------------------------------------------------------------------------------------------------------------------------------------------------------------------------------------------------------------------------------------------------------------------------------------------------------------------------------------------------------------------------------------------------------------------------------------------------------------------------------------------------------------------------------------------------------------------------------------------------------------------------------------------------------------------------------------------------------------------------------------------------------------------------------------------------------------------------------------------------------------------------------------------------------------------------------------------------------------------------------------------------------------------------------------------------------------------------------------------------------------------------------------------------------------------------------------------------|

|                        |                                                     |
|------------------------|-----------------------------------------------------|
| <b>REVIEWER</b>        | Professor Simon Coulton<br>University of Kent<br>UK |
| <b>REVIEW RETURNED</b> | 25-Jul-2019                                         |

|                         |                                                                                                                                                                                                                                                                                                                                                                                                                                                                                                                                                                                                                                                                                                                                                                                                                                                                                                              |
|-------------------------|--------------------------------------------------------------------------------------------------------------------------------------------------------------------------------------------------------------------------------------------------------------------------------------------------------------------------------------------------------------------------------------------------------------------------------------------------------------------------------------------------------------------------------------------------------------------------------------------------------------------------------------------------------------------------------------------------------------------------------------------------------------------------------------------------------------------------------------------------------------------------------------------------------------|
| <b>GENERAL COMMENTS</b> | <p>The authors present an interesting piece of research and a very readable, competent manuscript. There are a few minor issues they may want to take into account and I present them below</p> <ol style="list-style-type: none"> <li>1. The authors have published similar studies in a similar population previously and I wondered whether it was worth comparing the results of these studies with this one. I particularly note that the province of problem gambling in this population is almost threefold the prevalence reported in the 2013 survey of a similar population.</li> <li>2. An issue I have with path analysis is the way it is represented. In my understanding with a survey such as this you are exploring the extent to which the data fits an underlying hypothesised model, is it worth putting some more detail regarding the hypothesised model in the manuscript.</li> </ol> |
|-------------------------|--------------------------------------------------------------------------------------------------------------------------------------------------------------------------------------------------------------------------------------------------------------------------------------------------------------------------------------------------------------------------------------------------------------------------------------------------------------------------------------------------------------------------------------------------------------------------------------------------------------------------------------------------------------------------------------------------------------------------------------------------------------------------------------------------------------------------------------------------------------------------------------------------------------|

## VERSION 1 – AUTHOR RESPONSE

Reviewer: 1

Reviewer Name: Adilson Marques

Institution and Country: Faculdade de Motricidade Humana, Universidade de Lisboa, Portugal

Please state any competing interests or state 'None declared': none.

Please leave your comments for the authors below

Journal

BMJ Open

Title

Pathways connecting socio-economic status and health-risk behaviors

Manuscript ID

bmjopen-2019-031737

Comments

Thank you for the opportunity to read this paper. After reading the paper I have some comments and concerns that I will address in the following comments.

Abstract

Q1 Page 5, lines 10-15. The first sentence of the introduction can be deleted because it does not add anything meaningful to the article.

R1 We have deleted the sentence.

Introduction

Q2 Page 7, line 18. The relationship between pathological gambling and comorbidities for alcohol-related disorders should be eliminated. The article does not address this particular issue. By keeping this idea here, we should also explore the comorbidity rates associated with other dependencies.

R2 Thank you for your suggestion. The mention of alcohol-related disorders has been omitted and the sentence has been changed as follows: "Previous studies found that pathological gambling was often associated with alcohol, nicotine and substance dependence, suggesting that each of these types of behavior may serve as a primer for the others".

Q3 The introduction and the title do not seem to coincide. When reading the introduction the reader does not know that the article is related to gambling risk factors. This should be better explained in the title.

R3 The title has been changed as follows: "Pathways connecting socioeconomic variables, substance abuse and gambling behavior: a cross-sectional study on a sample of Italian high-school students".

Methods

Q4 There is no mention of the ethics committee approval.

R4 Thank you for pointing this out. We have now added the following sentence: "This study was approved by the ethics committee of the National Health Institute."

Q5 Page 10, line 40. What was the criterion for grouping the ages in this way?

R5 We divided the age range of the sample of students into two symmetrical groups.

Q6 Page 10, lines 40-56. How were the variables (education, employment status, and household income) integrated to calculate ESE? This should be explained clearly.

R6 The abovementioned variables were individually entered in the analysis, so we did not use a combined variable to calculate socioeconomic status. This affords a better understanding of the role of the single variables in the pathway analysis. When we wanted to mention these groups of variables in the body of the manuscript we referred to them as “socioeconomic status” because they are typically considered indicators of socioeconomic status, but as this could be confusing, we have replaced the term “status” with “variables”.

Q7 Page 11, line 47. The first sentence of the Statistical analysis subsection can be deleted.

R7 We have deleted the sentence as suggested. Thank you.

Q8 Page 11, line 52-54. Please specify the “other variables”.

R8 We have specified the variables by modifying the sentence as follows: “A set of Pearson’s chi-squared tests was used to highlight any associations between each health-risk behavior (gambling, alcohol consumption, smoking and cannabis use) and the demographic and socioeconomic variables (sex, age bracket, weekly income, level of economic dissatisfaction, paternal education, maternal employment, paternal employment, death of a parent, type of school, and geographical area).”

## Results

Q9 If possible, please add a table (table 1) with participants’ characteristics.

R9 We have added Table 1 with the participants’ characteristics

Q10 Table 1 presents the bivariate relationship between SES variables and risk behaviors. However, this relationship is not always real, because the analyzes are not adjusted. Thus, I suggest that the analyzes be done through logistic regression, in which risk behaviors enter as dependent variables, and the SES variables enter as independent variables. A model must be made for each risky behavior. With the logistic regression model, they will have the odds ratio and confidence interval, which is more important than p-value.

Reading the results section, I feel that the pathways were not properly explored. There is a figure and seem to be all.

R10 The aim of this study was to create a pathway model comprehensively describing how the variables considered were associated with multiple outcomes and the statistical method used for this purpose was a multivariate regression analysis, which connects independent variables with multiple outcomes. A single logistic regression analysis would not allow us to describe the association between independent variables and more than one dependent variable, and does not enable a pathway to be built.

## Discussion

Q11 Page 18, line 19. I could see where the odds ratios were presented in the results section.

R11 We have deleted the repetition. Thank you for your suggestion.

Q12 Page 18, line 37. Delete “Error! Bookmark not defined.”

R12 Thank you for noticing this error. It has been deleted.

Reviewer: 2

Reviewer Name: Professor Simon Coulton

Institution and Country:

University of Kent

UK

Please state any competing interests or state 'None declared': none

Please leave your comments for the authors below

The authors present an interesting piece of research and a very readable, competent manuscript.

There are a few minor issues they may want to take into account and I present them below

Q1b The authors have published similar studies in a similar population previously and I wondered whether it was worth comparing the results of these studies with this one. I particularly note that the province of problem gambling in this population is almost threefold the prevalence reported in the 2013 survey of a similar population.

R1b In the study referring to the 2013 survey the two categories - at risk gamblers and problematic gamblers - were considered separately, and their prevalence was 4.1% and 3.1%, respectively. In the present study we pooled both problematic and at risk gamblers into the same category, as explained in the Methods section ("For the purpose of this study, the variable assessing gambling behavior was divided into two categories: non-gamblers and non-problem gamblers vs at risk and problem gamblers".), and their prevalence was 6.5%. So the prevalence of problem/at-risk gambling is actually similar in the two studies.

Q2b. An issue I have with path analysis is the way it is represented. In my understanding with a survey such as this you are exploring the extent to which the data fits an underlying hypothesised model, is it worth putting some more detail regarding the hypothesised model in the manuscript.

R2b We have added the following sentences in the Methods section. "Previous studies found that people who gambled also tended to have problems with substance abuse, and that certain sociodemographic factors were shared with determinants of these health-risk behaviors. No studies currently available in the literature have considered a broader framework, however, to test for the existence of a comprehensive structure of associations. We use a path analysis to test these associations. Such an approach can be useful in planning multi-component public health care and prevention programs."

## VERSION 2 – REVIEW

|                        |                                                                            |
|------------------------|----------------------------------------------------------------------------|
| <b>REVIEWER</b>        | Adilson Marques<br>Faculdade de Motricidade Humana, Universidade de Lisboa |
| <b>REVIEW RETURNED</b> | 06-Sep-2019                                                                |

|                         |                                          |
|-------------------------|------------------------------------------|
| <b>GENERAL COMMENTS</b> | I am pleased with the authors' revision. |
|-------------------------|------------------------------------------|

|                        |                                                  |
|------------------------|--------------------------------------------------|
| <b>REVIEWER</b>        | Professor Simon Coulton<br>University of Kent UK |
| <b>REVIEW RETURNED</b> | 14-Sep-2019                                      |

|                         |                                                                                   |
|-------------------------|-----------------------------------------------------------------------------------|
| <b>GENERAL COMMENTS</b> | The authors have responded to the previous review and addressed the issues raised |
|-------------------------|-----------------------------------------------------------------------------------|
